# Supplementary material for: PropAngio study protocol: a neoadjuvant trial on the efficacy of propranolol monotherapy in cutaneous angiosarcoma—a proof of principle study
Source: PubMed Central journal article supplement — BMJ Open. 2020 Sep 10;10(9):e039449. doi: 10.1136/bmjopen-2020-039449 (PMC7485254; doi:10.1136/bmjopen-2020-039449), 2020-09-10
Supplement: bmjopen-2020-039449.draft_revisions.pdf [file bmjopen-2020-039449.draft_revisions.pdf]

# BMJ Open

BMJ Open is committed to open peer review. As part of this commitment we make the peer review history of every article we publish publicly available.

When an article is published we post the peer reviewers' comments and the authors' responses online. We also post the versions of the paper that were used during peer review. These are the versions that the peer review comments apply to.

The versions of the paper that follow are the versions that were submitted during the peer review process. They are not the versions of record or the final published versions. They should not be cited or distributed as the published version of this manuscript.

BMJ Open is an open access journal and the full, final, typeset and author-corrected version of record of the manuscript is available on our site with no access controls, subscription charges or pay-per-view fees (<http://bmjopen.bmj.com>).

If you have any questions on BMJ Open's open peer review process please email [info.bmjopen@bmj.com](mailto:info.bmjopen@bmj.com)

# BMJ Open

## PropAngio: a neoadjuvant trial on the efficacy of propranolol monotherapy in cutaneous angiosarcoma A proof of principle study

|                               |                                                                                                                                                                                                                                                                                                                                                                                                                                                                                                                                                                                                                                                                                                                                                                                                                                                                                                                                                                                                                                                                                                                        |
|-------------------------------|------------------------------------------------------------------------------------------------------------------------------------------------------------------------------------------------------------------------------------------------------------------------------------------------------------------------------------------------------------------------------------------------------------------------------------------------------------------------------------------------------------------------------------------------------------------------------------------------------------------------------------------------------------------------------------------------------------------------------------------------------------------------------------------------------------------------------------------------------------------------------------------------------------------------------------------------------------------------------------------------------------------------------------------------------------------------------------------------------------------------|
| Journal:                      | <i>BMJ Open</i>                                                                                                                                                                                                                                                                                                                                                                                                                                                                                                                                                                                                                                                                                                                                                                                                                                                                                                                                                                                                                                                                                                        |
| Manuscript ID                 | bmjopen-2020-039449                                                                                                                                                                                                                                                                                                                                                                                                                                                                                                                                                                                                                                                                                                                                                                                                                                                                                                                                                                                                                                                                                                    |
| Article Type:                 | Protocol                                                                                                                                                                                                                                                                                                                                                                                                                                                                                                                                                                                                                                                                                                                                                                                                                                                                                                                                                                                                                                                                                                               |
| Date Submitted by the Author: | 15-Apr-2020                                                                                                                                                                                                                                                                                                                                                                                                                                                                                                                                                                                                                                                                                                                                                                                                                                                                                                                                                                                                                                                                                                            |
| Complete List of Authors:     | <p>Heinhuis, Kimberley; Netherlands Cancer Institute, Medical Oncology and Pharmacy &amp; Pharmacology<br/>         IJzerman, Nikki; Netherlands Cancer Institute, Medical oncology and Pharmacy &amp; Pharmacology; Erasmus MC Cancer Centre, Medical Oncology<br/>         Koenen, Anne Miek; Netherlands Cancer Institute, Medical Oncology and Pharmacy &amp; Pharmacology<br/>         van der Graaf, Winette; Radboudumc, Medical Oncology; Netherlands Cancer Institute, Medical oncology<br/>         Haas, Rick; Netherlands Cancer Institute, Radiotherapy<br/>         Beijnen, Jos; Netherlands Cancer Institute, Pharmacy &amp; Pharmacology; Utrecht University, Pharmaceutical sciences<br/>         Huitema, Alwin; Netherlands Cancer Institute - Antoni van Leeuwenhoek Hospital, Department of Pharmacy &amp; Pharmacology; University Medical Center Utrecht, Utrecht University, Department of Clinical Pharmacy<br/>         van Houdt, Winan; Netherlands Cancer Institute, Surgical Oncology<br/>         Steeghs, Neeltje; Netherlands Cancer Institute - Antoni van Leeuwenhoek Hospital</p> |
| Keywords:                     | ONCOLOGY, Adult oncology < ONCOLOGY, Sarcoma < ONCOLOGY, VASCULAR MEDICINE                                                                                                                                                                                                                                                                                                                                                                                                                                                                                                                                                                                                                                                                                                                                                                                                                                                                                                                                                                                                                                             |
|                               |                                                                                                                                                                                                                                                                                                                                                                                                                                                                                                                                                                                                                                                                                                                                                                                                                                                                                                                                                                                                                                                                                                                        |

SCHOLARONE™  
Manuscripts

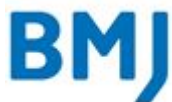

I, the Submitting Author has the right to grant and does grant on behalf of all authors of the Work (as defined in the below author licence), an exclusive licence and/or a non-exclusive licence for contributions from authors who are: i) UK Crown employees; ii) where BMJ has agreed a CC-BY licence shall apply, and/or iii) in accordance with the terms applicable for US Federal Government officers or employees acting as part of their official duties; on a worldwide, perpetual, irrevocable, royalty-free basis to BMJ Publishing Group Ltd ("BMJ") its licensees and where the relevant Journal is co-owned by BMJ to the co-owners of the Journal, to publish the Work in this journal and any other BMJ products and to exploit all rights, as set out in our [licence](#).

The Submitting Author accepts and understands that any supply made under these terms is made by BMJ to the Submitting Author unless you are acting as an employee on behalf of your employer or a postgraduate student of an affiliated institution which is paying any applicable article publishing charge ("APC") for Open Access articles. Where the Submitting Author wishes to make the Work available on an Open Access basis (and intends to pay the relevant APC), the terms of reuse of such Open Access shall be governed by a Creative Commons licence – details of these licences and which [Creative Commons](#) licence will apply to this Work are set out in our licence referred to above.

Other than as permitted in any relevant BMJ Author's Self Archiving Policies, I confirm this Work has not been accepted for publication elsewhere, is not being considered for publication elsewhere and does not duplicate material already published. I confirm all authors consent to publication of this Work and authorise the granting of this licence.

# PropAngio: a neoadjuvant trial on the efficacy of propranolol monotherapy in cutaneous angiosarcoma

*A proof of principle study*

Kimberley M Heinhuis<sup>1,5\*</sup>, Nikki S IJzerman<sup>1,2,5\*</sup>, Anne Miek Koenen<sup>3</sup>, Winette TA van der Graaf<sup>1</sup>, Rick L Haas<sup>4</sup>, Jos H Beijnen<sup>5,6</sup>, Alwin DR Huitema<sup>5,7</sup>, Winan J van Houdt<sup>3</sup>, Neeltje Steeghs<sup>1</sup>.

\*These authors contributed equally.

## Affiliations

1. Department of Medical Oncology, Netherlands Cancer Institute, Amsterdam, the Netherlands
2. Department of Medical Oncology, Erasmus MC Cancer Institute, Erasmus University Medical Center, Rotterdam, the Netherlands
3. Department of Surgical Oncology, Netherlands Cancer Institute, Amsterdam, the Netherlands
4. Department of Radiotherapy, the Netherlands Cancer Institute, Amsterdam, the Netherlands
5. Department of Pharmacy & Pharmacology, Netherlands Cancer Institute, Amsterdam, the Netherlands.
6. Department of Pharmaceutical Sciences, Utrecht University, Utrecht, the Netherlands
7. Department of Clinical Pharmacy, University Medical Center Utrecht, Utrecht University, Utrecht, the Netherlands

**Corresponding author:** Nikki S IJzerman; postal address; Plesmanlaan 121, 1066 CX Amsterdam, the Netherlands, phone number +31205126255; mail: N.IJzerman@nki.nl.

**Word count:** Abstract: 361, Manuscript: 2335.

**Keywords:** oncology; adult oncology; sarcoma; vascular medicine

## ABSTRACT

**Introduction:** Angiosarcoma is a rare and aggressive malignancy with a high metastatic potential and recurrence rate. Despite optimal treatment with surgery, with or without radiation, the prognosis remains poor and, therefore, new treatment strategies are warranted. Recently, propranolol has effectively been repurposed for the treatment of hemangioma. Propranolol is a nonselective antagonist of the  $\beta$ -adrenergic receptor, a receptor that is highly expressed in hemangioma. Angiosarcoma has several similarities with hemangioma, including its high  $\beta$ -adrenergic receptor expression and the supposedly important role of VEGF in malignant growth. As a result, propranolol has been administered small-scale in individual angiosarcoma cases with promising results. The precise effect of propranolol, however, is not yet established.

**Methods and analysis:** The goal of this neoadjuvant window of opportunity study is to prospectively evaluate the activity of propranolol monotherapy in patients with cutaneous angiosarcoma. The neoadjuvant setting provides a good opportunity to rapidly evaluate both the clinical response and histological response, without a significant delay in standard anti-cancer treatment. Fourteen patients with primary, recurrent or metastatic cutaneous angiosarcoma will be included. Propranolol will be administered orally in an escalating dose during three to six weeks, before the initiation of standard treatment. The primary endpoint is clinical response according to RECIST, as measured on consecutive coloured photographs or CT/MRI. The histological response will be determined as secondary endpoint, comparing the difference in proliferation index before and after propranolol. The study will be considered positive when at least 3 patients have a response to propranolol.

**Ethics and dissemination:** Ethical approval was obtained from the Medical Ethical Committee of the Netherlands Cancer Institute. Independent of the outcome, results of this study will be shared and submitted for publication in an international peer-reviewed journal.

**Trial registration number:** Registry through the Netherlands Trial Register (Trial no. NL8118).

## Strengths and limitations of this study

- Drug repurposing is a process of developing approved drugs for new medical indications.
- This proof-of-principle study will help to elucidate the effect of a well-known drug (propranolol) for a new indication (cutaneous angiosarcoma).
- Propranolol is a generic and therefore relatively cheap product with a favourable safety profile.
- The neoadjuvant setting provides the opportunity to evaluate the antitumor response without delaying the standard treatment.

For peer review only

## INTRODUCTION

Angiosarcoma is a rare and aggressive malignancy with a high metastatic potential. The estimated incidence of angiosarcoma is 0.4 per million patients per year, making it a very rare disease.[1] The standard of care for localised angiosarcoma is currently complete surgical resection with or without radiation. Unfortunately, despite the current standard of care, only 60% of patients with localized disease survive for more than five years.[2] Physicians and researchers are, therefore, in urgent need to find better treatment options for these patients.

Various additional drugs for systemic treatment have been investigated before.[2–4] Although the role of (neo)adjuvant chemotherapy remains controversial for localised disease, neoadjuvant chemotherapy is often administered for locally advanced angiosarcoma.[3,5–8] Several cytotoxic drugs, including anthracyclines, taxanes and gemcitabine, have shown activity in angiosarcoma in the locally advanced and metastatic setting, with overall response rates varying from 17 to 89%.[2–4] However, for the treatment of resectable angiosarcoma, none of the previous studies show a prolonged disease-free survival or overall survival.[3,5–10] Improved treatment in the neoadjuvant setting might reduce the local and distant recurrence rates by treating micrometastases at an early stage and by improving the resection margins, potentially leading to higher survival rates. As a result, new drugs are urgently needed to prolong the survival.

Propranolol hydrochloride, a synthetic nonselective  $\beta$ -adrenergic receptor antagonist, was registered by the Food and Drug Agency (FDA) decades ago for the treatment of hypertension. Drug repurposing is a drug development strategy focused on the reuse of existing drugs for new medical indications. Recently, propranolol has been repurposed and is now used in the treatment of hemangioma. Hemangioma is a benign vascular tumour and propranolol dosed 3 mg/kg led to a complete to near complete resolution in approximately 88% of the treated infants with hemangioma.[11,12] The pharmacological effects of propranolol in hemangioma are presumed to cause vasoconstriction, a decreased expression of vascular growth endothelial growth factor (VEGF) and basic fibroblast growth factor (bFGF), inhibition of migration and proliferation of tumour cells and induction of apoptosis of endothelial cells.[12–16] Angiosarcoma have several similarities with hemangioma, including its high  $\beta$ -adrenergic receptor expression and the supposedly important role of VEGF in malignant growth.[11,17]

Several small case reports and case series have confirmed the idea that propranolol could be repurposed to treat angiosarcoma. In these case reports, patients with locally advanced or

1  
2  
3 metastatic angiosarcoma have been treated with propranolol, in combination with various  
4 chemotherapy regimens, including combination therapy with cyclophosphamide, etoposide,  
5 paclitaxel and vinblastine-based chemotherapy. The dose of propranolol in combination therapy  
6 varied between 80 to 120 mg per day.[18–23] In one case there was a response after 1 week of  
7 propranolol monotherapy 40 mg twice a day (BID).[20] These doses of propranolol are much  
8 lower than the standard maintenance dose of 160-320 mg daily for patients with hypertension.[24]  
9 Furthermore, there was a reduction in the proliferative index of 34%, stabilization of tumour  
10 growth and less necrosis.[20] Additionally, one case described a patient with metastatic cardiac  
11 angiosarcoma who showed a long term response (>12 months) to propranolol monotherapy, while  
12 the mean survival time is only four months.[25]

13  
14  
15  
16  
17  
18  
19  
20 Since literature regarding the activity and mode of action of propranolol as a single agent  
21 for angiosarcoma is scarce, our aim is to evaluate the activity of propranolol monotherapy in  
22 patients with primary, recurrent or metastatic cutaneous angiosarcoma before they proceed to their  
23 standard anti-cancer treatment. The neoadjuvant setting provides a good opportunity to rapidly  
24 evaluate both the clinical and histological response, without delaying the standard anti-cancer  
25 treatment. Additional advantages of propranolol therapy would be the ease of use and the relatively  
26 mild toxicity profile. If this study turns out to be positive, further (randomized) clinical trials are  
27 thereby substantiated and highly recommended.

## 28 29 30 31 32 33 34 35 36 **METHODS AND ANALYSIS**

### 37 **Aim and objectives**

38  
39 The aim of this study is to investigate the effect of neoadjuvant propranolol monotherapy in  
40 patients with primary, recurrent or metastatic cutaneous angiosarcoma, before they proceed to their  
41 standard anti-cancer treatment (e.g. isolated limb perfusion, chemotherapy, targeted therapy,  
42 surgical resection or radiotherapy). The primary objective is to determine the clinical response of  
43 propranolol monotherapy and the histologic response will be evaluated as secondary objective.

### 44 45 46 47 48 49 **Study design and study treatment**

50  
51 This is a prospective proof of principle study with neoadjuvant propranolol monotherapy in  
52 cutaneous angiosarcoma patients. We will use the neoadjuvant window as an opportunity to  
53 explore the activity of propranolol monotherapy, without delaying the standard treatment. The



duration of treatment will be three to six weeks. In this single arm trial, angiosarcoma patients will be treated with propranolol monotherapy in an inpatient escalating dose, which will be adjusted to the tolerability of propranolol. The treatment plan of propranolol is provided in *Table 1*. The treatment plan was designed based on doses used in previous literature [15,19,22,23] and not exceeding the maximum maintenance dose of 320 mg/day for the registered indication hypertension (maximum daily dose in our study 240 mg/day).[24] In case of hypotension (blood pressure <90/60 mmHg) or bradycardia (heart rate <55 bpm), or symptoms of bradycardia or hypotension (dizziness, syncope) the dose will be reduced to the previous dose level. In case of serious bradycardia (heart rate <50 bpm), the treatment will be stopped until an acceptable heart rate (>55 bpm) is reached and propranolol will be restarted in the dose of the previous level.

*Table 1. Propranolol treatment plan.*

| <b>Dose escalation scheme</b>                   |                   |              |
|-------------------------------------------------|-------------------|--------------|
| <b>Period</b>                                   | <b>Dose level</b> | <b>Dose</b>  |
| Day 1 – Day 7                                   | 1*                | 2x/day 40 mg |
| Day 8 – Day 14                                  | 2*                | 2x/day 80 mg |
| Day 15 – Day of surgery or biopsy               | 3*                | 3x/day 80 mg |
| <b>Tapering off scheme after surgery/biopsy</b> |                   |              |
| <b>Period</b>                                   | <b>Dose</b>       |              |
| Day 1 - Day 7                                   | 2x/day 80 mg      |              |
| Day 8 - Day 14                                  | 2x/day 40 mg      |              |

\*All patients start on day 1 with dose level 1.

The tolerability will be assessed during weekly visits in the outpatient clinic (*figure 1*). Each visit consists of a physical examination, blood draw for safety assessment (hematology, hepatic- and renal function), vital signs, electrocardiogram (ECG), toxicity assessment, concomitant medication registration and tumour response assessment. After the study treatment, a biopsy will be obtained to evaluate the histologic response to propranolol monotherapy. Propranolol will be tapered off after the biopsy, to prevent withdrawal symptoms (*table 1*).

## Patient selection

The study population consists of patients with primary, recurrent or metastatic cutaneous angiosarcoma, including angiosarcoma of the breast. Only patients with cutaneous angiosarcoma can participate, since these tumours are easily measurable on coloured photographs for clinical response evaluation. Patients are eligible if they are at least 18 years old; have a good performance status (world health organization (WHO-PS) of 0-2); have an adequate blood count, kidney and renal function; have a window of at least three weeks between their diagnosis and the start of the standard anti-cancer treatment and have evaluable disease according to the Response Evaluation Criteria in Solid Tumours (RECIST) 1.1 criteria. Patients with primary visceral angiosarcoma, contraindications for  $\beta$ -blockade therapy or current treatment with  $\beta$ -blockade therapy (both selective and non-selective  $\beta$ -blockade therapy) or other anti-cancer treatment are excluded.

## Sample size calculation

An exact single-stage phase II design will be used with a one-sided significance level  $\alpha$  of 0.05 and a power of 80%. The maximum response rate that would be of no interest was assumed to be 5% and the minimum required response rate 30%. A total of 14 patients will be included in the study. If 3 or more out of these 14 patients have a response as defined in the study endpoints, the study is considered positive.

## Study endpoints

### *Primary endpoint*

The clinical response will be determined according to RECIST 1.1 criteria (PD is >20% increase in size, PR is >30% decrease in size, SD is in between while CR is no measurable disease).(26) A response is defined as CR, PR, or SD with an improvement in clinical characteristics, like thickness, erythema, necrosis or edema of the inflicted area. Documentation will be performed with colour photography, including a ruler to measure the size of the lesion. Radiologic assessment will only be done if the patient has radiologic evaluable disease at the beginning of the study treatment. If the study turns out to be positive, this treatment modality is highly interesting and should be tested further in a randomized trial.

### ***Secondary endpoint***

The histologic response on propranolol treatment is defined as difference in proliferation index. This will be assessed by measuring the change in immunohistochemistry staining of Ki-67 and the tumour activity between the post-treatment biopsy (obtained during surgery if applicable) and the diagnostic biopsy before the study treatment. A decrease of >30% of the Ki-67 staining will be considered as a positive histologic response.

### ***Exploratory endpoints***

To obtain additional data regarding the primary objectives, the percentage of adrenergic receptors (ADRB1, ADRB2, and ADRB3) in the pre-treatment biopsies will be measured with immunohistochemically staining and the correlation with the anti-tumour response of the angiosarcoma patients will be investigated.[13,20] With this correlation analysis, the predictive value of adrenergic receptor expression in tumour tissue on the anti-tumour response will be assessed. Furthermore, we plan to assess the drug sensitivity with and without different chemotherapy regimens *in vitro*. Finally, we will compare the PET response before start of treatment and at the end of propranolol treatment.

### **Study logistics**

#### ***Patient recruitment and study duration***

Treating physicians will identify patients as possible candidates and inform patients about the study. If patients agree to participate and fulfil the selection criteria, patients will be included during an outpatient clinic visit. As this is a monocenter study, all patients will be included in the Netherlands Cancer Institute (NKI). Approximately 20 new angiosarcoma patients are seen in the NKI yearly. As a result, the expected duration of the study is two years. Enrolment started on 27 December 2019.

#### ***Safety assessments***

All adverse events will be recorded in the electronic case report forms (eCRF) during the weekly outpatient clinic visits. We will perform extra blood draws, ECGs and measurements of the vital signs during these visits for safety assessments. The recording of the adverse events will be done

1  
2  
3 according to the National Cancer Institute Common Toxicity Criteria for Adverse Events  
4 (CTCAE) version 5.0.  
5  
6

### 7 8 *Data management* 9

10 The original results will also be recorded in the eCRF by the investigators of the study. The data  
11 entry will be supervised by the Clinical Research Monitor.  
12  
13

### 14 15 *Study monitoring* 16

17 Monitoring of the study will be performed according to ICH GCP by the Clinical Research Monitor  
18 of the NKI or the person to whom the monitoring tasks have been delegated. Amongst others the  
19 following will be reviewed: compliance with the protocol, ICH GCP and all applicable regulatory  
20 requirements; consent procedures, including date of consent and signatures; study progress;  
21 (Serious) Adverse Events; completion of the (e)CRFs and verification of data against the source  
22 data; and storage, dispensing and accountability of study medication.  
23  
24

25 The Medical Ethical Committee of the NKI will review the study every year throughout the  
26 complete study duration. During this review, the committee will focus on monitoring of the safety of  
27 patients and evaluate the balance between the efficacy and the harmfulness of propranolol.  
28  
29  
30  
31  
32  
33

### 34 35 *Termination of the study* 36

37 An interim analysis is planned after the treatment of seven patients. If there are already three or  
38 more responses at this time point, the study will be stopped and stated positive. Otherwise an  
39 additional seven patients will be included. Results of the study will be shared and be submitted for  
40 publication in an international peer-reviewed journal.  
41  
42  
43

### 44 45 *Patient and public involvement statement* 46

47 The trial protocol and other trial documents were developed in collaboration with the Dutch  
48 sarcoma patient advocacy group. They evaluated the specific patient need for this trial. They fully  
49 support this trial and the concept of exploring drug-repurposing strategies to improve outcome in  
50 sarcoma. The patient advocacy group will be informed about the progress of the study and the  
51 study time lines.  
52  
53  
54  
55  
56  
57  
58  
59  
60

1  
2  
3 The study is funded by a Belgian non-profit organisation: the Anticancer Fund. Their mission is  
4 to complement current cancer care with patient-first thinking and a focus on evidence-based  
5 potential for new treatments. Financially, the Anticancer Fund is completely dependent on  
6 donations and private funding. The Anticancer Fund supports diverse clinical trials, mainly in  
7 under-prioritised treatment groups (such as in rare tumours), with non-conventional therapies and  
8 repurposed drugs. The trial was registered in the Netherlands Trial Register (NL71090.031.19).  
9  
10  
11  
12  
13  
14

### 15 **Ethics and dissemination**

16  
17 Ethical approval was obtained from the Medical Ethical Committee of the Netherlands Cancer  
18 Institute. Independent of the outcome, results of this study will be shared and submitted for  
19 publication in an international peer-reviewed journal.  
20  
21

22 All essential documents (including patient files, the Investigator Study File, CRF's and electronic  
23 study data), data management and statistical files will be kept for 15 years.  
24  
25  
26

### 27 **CONCLUSION**

28  
29 Angiosarcoma is an extremely rare and aggressive malignancy with a high metastatic potential and  
30 a dismal prognosis. The current standard treatment cannot sufficiently manage the disease.  
31 Therefore, new strategies are warranted. Drug repurposing is a process of developing approved  
32 drugs for new medical indications. A strong rationale for repurposing of propranolol for the  
33 treatment of angiosarcoma patients exists. The precise effect of propranolol monotherapy is not  
34 yet established. In this study, we will therefore address the question about the efficacy of  
35 propranolol as neoadjuvant monotherapy in patients with cutaneous angiosarcoma. If this study  
36 shows positive results, further clinical trials are needed to establish the role of propranolol in the  
37 treatment of angiosarcoma, possibly even in combination with other agents such as chemotherapy,  
38 targeted therapy or immunotherapy.  
39  
40  
41  
42  
43  
44  
45  
46  
47

### 48 **Acknowledgments**

49  
50 The authors would like to thank the Dutch sarcoma patient advocacy group (Patiëntenplatform  
51 Sarcomen) and the Anticancer Fund for their contributions to the study.  
52  
53  
54  
55  
56  
57  
58  
59  
60

### **Authors' contributions**

KH, NIJ, AMK, WG, RH, JB, AH, WH and NS each made substantial contributions to the conception or design of the study protocol. NIJ and KH wrote the first draft of the protocol and this paper. AMK, WG, RH, WH, JB, AH and NS provided critical input regarding the design of the study or study logistics. KH, NIJ, AMK, WG, RH, JB, AH, WH and NS revised the protocol critically and approved the final version to be published.

### **Funding statement**

This work was supported by Anticancer Fund from Belgium, grant number 40117.

### **Competing interest statements**

The authors declare that they have no conflicts of interest related to this study.

## REFERENCES

1. Rouhani P, Fletcher CD, Devesa SS, et al. Cutaneous soft tissue sarcoma incidence patterns in the U.S. : an analysis of 12,114 cases. *Cancer* 2008;113(3):616–27.
2. Young RJ, Brown NJ, Reed MW, et al. Angiosarcoma. *Lancet Oncol* 2010;11(10):983–91.
3. Oxenberg J, Khushalani NI, Salerno KE, et al. Neoadjuvant chemotherapy for primary cutaneous/soft tissue angiosarcoma: Determining tumor behavior prior to surgical resection. *J Surg Oncol* 2015;111(7):829–33.
4. Stacchiotti S, Palassini E, Sanfilippo R, et al. Gemcitabine in advanced angiosarcoma: a retrospective case series analysis from the Italian Rare Cancer Network. *Ann Oncol* 2012;23(2):501–8.
5. DeMartelaere SL, Roberts D, Burgess MA, et al. Neoadjuvant chemotherapy–specific and overall treatment outcomes in patients with cutaneous angiosarcoma of the face with periorbital involvement. *Head Neck* 2008;30(5):639–46.
6. Fayette J, Martin E, Piperno-Neumann S, et al. Angiosarcomas, a heterogeneous group of sarcomas with specific behavior depending on primary site: a retrospective study of 161 cases. *Ann Oncol* 2007;18(12):2030–6.
7. Guadagnolo BA, Zagars GK, Araujo D, et al. Outcomes after definitive treatment for cutaneous angiosarcoma of the face and scalp. *Head Neck* 2011;33(5):661–7.
8. Sinnamon AJ, Neuwirth MG, McMillan MT, et al. A prognostic model for resectable soft tissue and cutaneous angiosarcoma. *J Surg Oncol* 2016;114(5):557–63.
9. Li H, Yang S, Chen H, et al. Survival after heart transplantation for non-metastatic primary cardiac sarcoma. *J Cardiothorac Surg* 2016;11(1):145.
10. Abu Saleh WK, Ramlawi B, Shapira OM, et al. Improved Outcomes With the Evolution of a Neoadjuvant Chemotherapy Approach to Right Heart Sarcoma. *Ann Thorac Surg* 2017;104(1):90–6.
11. Léauté-Labrèze C, Hoeger P, Mazereeuw-Hautier J, et al. A Randomized, Controlled Trial of Oral Propranolol in Infantile Hemangioma. *N Engl J Med* 2015;372(8):735–46.
12. Léauté-Labrèze C, de la Roque ED, Hubiche T, et al. Propranolol for Severe Hemangiomas of Infancy. *N Engl J Med* 2008;358(24):2649–51.
13. Chisholm KM, Chang KW, Truong MT, et al.  $\beta$ -Adrenergic receptor expression in vascular tumors. *Mod Pathol* 2012;25(11):1446–51.

14. Stiles JM, Amaya C, Rains S, et al. Targeting of beta adrenergic receptors results in therapeutic efficacy against models of hemangioendothelioma and angiosarcoma. *PLoS One* 2013;8(3):e60021.
15. Amaya CN, Perkins M, Belmont A, et al. Non-selective beta blockers inhibit angiosarcoma cell viability and increase progression free- and overall-survival in patients diagnosed with metastatic angiosarcoma. *Oncoscience* 2018;5(3–4):109–19.
16. Pasquier E, Ciccolini J, Carre M, et al. Propranolol potentiates the anti-angiogenic effects and anti-tumor efficacy of chemotherapy agents: implication in breast cancer treatment. *Oncotarget* 2011;2(10):797–809.
17. Weidema ME, Flucke UE, van der Graaf WTA et al. Prognostic Factors in a Large Nationwide Cohort of Histologically Confirmed Primary and Secondary Angiosarcomas. *Cancers (Basel)* 2019;11(11):epub 12 Nov 2019.
18. Daguzé J, Saint-Jean M, Peuvrel L, et al. Visceral metastatic angiosarcoma treated effectively with oral cyclophosphamide combined with propranolol. *JAAD Case Reports* 2016;2(6):497–9.
19. Pasquier E, André N, Street J, et al. Effective Management of Advanced Angiosarcoma by the Synergistic Combination of Propranolol and Vinblastine-based Metronomic Chemotherapy: A Bench to Bedside Study. *EBioMedicine* 2016;6:87–95.
20. Chow W, Amaya CN, Rains S, et al. Growth Attenuation of Cutaneous Angiosarcoma With Propranolol-Mediated  $\beta$ -Blockade. *JAMA dermatology* 2015;151(11):1226–9.
21. Pramanik R, Gogia A, Malik PS, et al. Metastatic Primary Angiosarcoma of the Breast: Can We Tame It the Metronomic Way. *Indian J Med Paediatr Oncol* 2017;38(2):228–31.
22. Banavali S, Pasquier E, Andre N. Targeted therapy with propranolol and metronomic chemotherapy combination: sustained complete response of a relapsing metastatic angiosarcoma. *Ecancermedicalscience* 2015;9:499.
23. Daguzé J, Saint-Jean M, Dréno B. Large nose angiosarcoma treated effectively with oral cyclophosphamide combined with propranolol. *J Eur Acad Dermatology Venereol* 2018;32(2):e52–4.
24. Nederland Zorginstituut. Farmacotherapeutisch Kompas - Propranolol (cardiovasculair of neurologisch).[Internet]. Available from: [https://www.farmacotherapeutischkompas.nl/bladeren/preparaatteksten/p/propranolol\\_\\_ca](https://www.farmacotherapeutischkompas.nl/bladeren/preparaatteksten/p/propranolol__ca)



rdiovasculair\_of\_neurologisch\_#eigenschappen. Accessed on 31 March 2020.

25. Galván DC, Ayyappan AP, Bryan BA. Regression of primary cardiac angiosarcoma and metastatic nodules following propranolol as a single agent treatment. *Oncoscience* 2018;5(9–10):262.
26. Schwartz LH, Seymour L, Litière S, et al. RECIST 1.1 - Standardisation and disease-specific adaptations: Perspectives from the RECIST Working Group. *Eur J Cancer*. 2016;62(Jul):138–45.

### Legends

*Figure 1. Study assessments.* Figure 1 gives an overview of the study assessments, which are planned at baseline, during study treatment or when the standard treatment is initiated.

1  
2  
3  
4  
5  
6  
7  
8  
9  
10  
11  
12  
13  
14  
15  
16  
17  
18  
19  
20  
21  
22  
23  
24  
25  
26  
27  
28  
29  
30  
31  
32  
33  
34  
35  
36  
37  
38  
39  
40  
41  
42  
43  
44  
45  
46  
47  
48  
49  
50  
51  
52  
53  
54  
55  
56  
57  
58  
59  
60

**Baseline**

- Informed consent
- Biopsy
- Physical exam
- Laboratory exams
- ECG
- Tumor measurement

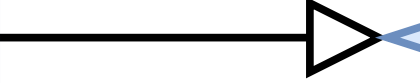

Start  
propranolol



**Study treatment  
3-6 weeks**

Weekly study assessments:

- Physical examination
- Laboratory exams
- ECG
- Tumor measurement

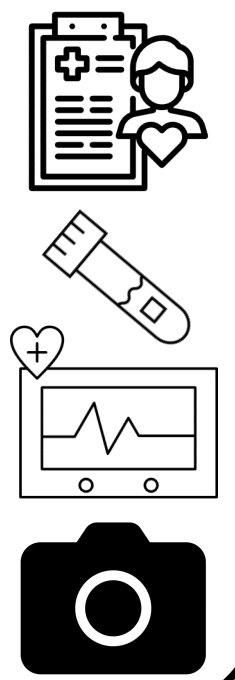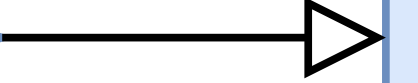

**Standard treatment**

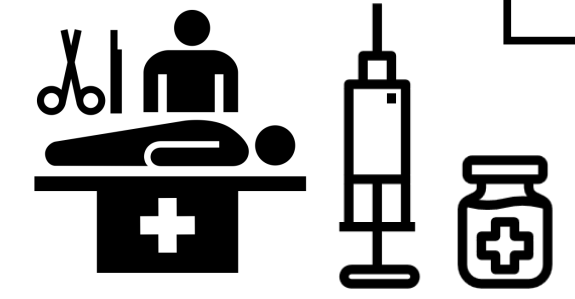

Tapering off  
propranolol

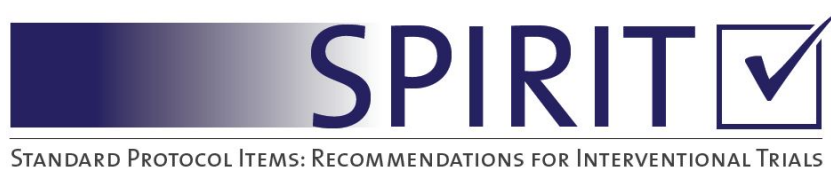

SPIRIT 2013 Checklist: Recommended items to address in a clinical trial protocol and related documents\*

| Section/item                      | Item No | Description                                                                                                                       |
|-----------------------------------|---------|-----------------------------------------------------------------------------------------------------------------------------------|
| <b>Administrative information</b> |         |                                                                                                                                   |
| Title                             | 1       | PropAngio: a neoadjuvant trial on the efficacy of propranolol monotherapy in cutaneous angiosarcoma<br>A proof of principle study |
| Trial registration                | 2a      | Registry through the Netherlands Trial Register (Trial no. NL8118).                                                               |
|                                   | 2b      | <a href="https://www.trialregister.nl/trial/8118">https://www.trialregister.nl/trial/8118</a>                                     |
| Protocol version                  | 3       | Version 2.0, 7 October 2019                                                                                                       |
| Funding                           | 4       | The study is funded by the Anticancer Fund from Belgium.                                                                          |

1  
2 Roles and responsibilities 5a Kimberley M. Heinhuis<sup>1,5\*</sup>, Nikki S. IJzerman<sup>1,2,5\*</sup>, Anne Miek Koenen<sup>3</sup>,  
3 Winette T.A. van der Graaf<sup>1</sup>, Rick L. Haas<sup>4</sup>, Jos H. Beijnen<sup>5,6</sup>, Alwin  
4 D.R. Huitema<sup>5,7</sup>, Winan J. van Houdt<sup>3</sup>, Neeltje Steeghs<sup>1</sup>.

5 \*These authors contributed equally.

6  
7  
8 Affiliations

9 1. Department of Medical Oncology, Netherlands Cancer  
10 Institute, Amsterdam, the Netherlands

11 2. Department of Medical Oncology, Erasmus MC Cancer  
12 Institute, Erasmus University Medical Center, Rotterdam, the  
13 Netherlands

14 3. Department of Surgical Oncology, Netherlands Cancer  
15 Institute, Amsterdam, the Netherlands

16 4. Department of Radiotherapy, the Netherlands Cancer Institute,  
17 Amsterdam, the Netherlands

18 5. Department of Pharmacy & Pharmacology, Netherlands  
19 Cancer Institute, Amsterdam, the Netherlands.

20 6. Department of Pharmaceutical Sciences, Utrecht University,  
21 Utrecht, the Netherlands

22 7. Department of Clinical Pharmacy, University Medical Center  
23 Utrecht, Utrecht University, Utrecht, the Netherlands

24  
25  
26 Authors' contributions

27 KH, NIJ, AMK, WG, RH, JB, AH, WH and NS each made substantial  
28 contributions to the conception or design of the study protocol. NIJ  
29 and KH wrote the first draft of the protocol and this paper. AMK, WG,  
30 RH, WH, JB, AH and NS provided critical input regarding the design  
31 of the study or study logistics. KH, NIJ, AMK, WG, RH, JB, AH, WH  
32 and NS revised the protocol critically and approved the final version to  
33 be published.

34  
35  
36 5b Anticancer Fund Belgium, Liese Vandeborne, Research Manager, +32  
37 2 268 48 16, [www.anticancerfund.org](http://www.anticancerfund.org), Boechoutlaan 221, 1853  
38 Strombeek-Bever, Belgium.

39  
40  
41 5c The study sponsor and funders will not have ultimate authority in  
42 study design; collection, management, analysis, and interpretation of  
43 data; writing of the report; and the decision to submit the report for  
44 publication.

45  
46  
47 5d Not applicable.  
48  
49  
50  
51  
52  
53  
54  
55  
56  
57  
58  
59  
60

## Introduction

### Background and rationale

6a

Angiosarcoma is a rare and aggressive malignancy with a high metastatic potential.(1) The standard of care for localised angiosarcoma is currently complete surgical resection with or without radiation. Unfortunately, despite the current standard of care, only 60% of patients with localized disease survive for more than five years.(2)

Several cytotoxic drugs, including anthracyclines, taxanes and gemcitabine, have shown activity in angiosarcoma in the locally advanced and metastatic setting, with overall response rates varying from 17 to 89%.(2–4) However, for the treatment of resectable angiosarcoma, none of the previous studies show a prolonged disease-free survival or overall survival.(3,5–10) Improved treatment in the neoadjuvant setting might reduce the local and distant recurrence rates by treating micrometastases at an early stage and by improving the resection margins, potentially leading to higher survival rates. As a result, new drugs are urgently needed to prolong the survival.

Recently, propranolol has been repurposed and is now successfully used in the treatment of hemangioma.(11,12) Angiosarcoma have several similarities with hemangioma, including its high  $\beta$ -adrenergic receptor expression and the supposedly important role of VEGF in malignant growth.(11,17)

Several small case reports and case series have confirmed the idea that propranolol could be repurposed to treat angiosarcoma. The dose of propranolol in combination therapy varied between 80 to 120 mg per day.(18–23) These doses of propranolol are much lower than the standard maintenance dose of 160-320 mg daily for patients with hypertension.(24)

Since literature regarding the activity and mode of action of propranolol as a single agent for angiosarcoma is scarce, our aim is to evaluate the activity of propranolol monotherapy in patients with primary, recurrent or metastatic cutaneous angiosarcoma before they proceed to their standard anti-cancer treatment. The neoadjuvant setting provides a good opportunity to rapidly evaluate both the clinical and histological response, without delaying the standard anti-cancer treatment. Additional advantages of propranolol therapy would be the ease of use and the relatively mild toxicity profile. If this study turns out to be positive, further (randomized) clinical trials are thereby substantiated and highly recommended.

*[Reference numbers refer to references list in paper].*

6b

This is a proof of principle study with no comparator because there is no current standard neoadjuvant treatment for angiosarcoma.

- 1  
2  
3  
4  
5  
6  
7  
8  
9  
10  
11  
12  
13  
14  
15  
16  
17  
18  
19
- Objectives 7 The aim of this study is to investigate the effect of neoadjuvant propranolol monotherapy in patients with primary, recurrent or metastatic cutaneous angiosarcoma, before they proceed to their standard anti-cancer treatment (e.g. isolated limb perfusion, chemotherapy, targeted therapy, surgical resection or radiotherapy). The primary objective is to determine the clinical response of propranolol monotherapy and the histologic response will be evaluated as secondary objective.
- Trial design 8 This is a single armed, phase II, proof of principle study.

20  
21  
22  
23  
24  
25  
26  
27  
28  
29  
30  
31  
32  
33  
34  
35  
36  
37  
38  
39  
40  
41  
42

### Methods: Participants, interventions, and outcomes

- Study setting 9 This is a monocenter study and all patients will be treated in the Netherlands Cancer institute in Amsterdam, Antoni van Leeuwenhoek hospital.
- Eligibility criteria 10 The study population consists of patients with primary, recurrent or metastatic cutaneous angiosarcoma, including angiosarcoma of the breast. Only patients with cutaneous angiosarcoma can participate, since these tumours are easily measurable on coloured photographs for clinical response evaluation. Patients are eligible if they are at least 18 years old; have a good performance status (world health organization (WHO-PS) of 0-2); have an adequate blood count, kidney and renal function; have a window of at least three weeks between their diagnosis and the start of the standard anti-cancer treatment and have evaluable disease according to the Response Evaluation Criteria in Solid Tumours (RECIST) 1.1 criteria. Patients with primary visceral angiosarcoma, contraindications for  $\beta$ -blockade therapy or current treatment with  $\beta$ -blockade therapy (both selective and non-selective  $\beta$ -blockade therapy) or other anti-cancer treatment are excluded.
- Interventions 11a All patients will follow the same scheme (single armed study):

| Dose escalation scheme                   |              |              |
|------------------------------------------|--------------|--------------|
| Period                                   | Dose level   | Dose         |
| Day 1 – Day 7                            | 1*           | 2x/day 40 mg |
| Day 8 – Day 14                           | 2*           | 2x/day 80 mg |
| Day 15 – Day of surgery or biopsy        | 3*           | 3x/day 80 mg |
| Tapering off scheme after surgery/biopsy |              |              |
| Period                                   | Dose         |              |
| Day 1 - Day 7                            | 2x/day 80 mg |              |
| Day 8 - Day 14                           | 2x/day 40 mg |              |

- 1  
2  
3  
4  
5  
6  
7  
8  
9  
10  
11  
12  
13  
14  
15  
16  
17  
18  
19  
20  
21  
22  
23  
24  
25  
26  
27  
28  
29  
30  
31  
32  
33  
34  
35  
36  
37  
38  
39  
40  
41  
42  
43  
44  
45  
46  
47  
48  
49  
50  
51  
52  
53  
54  
55  
56  
57  
58  
59  
60
- 11b In case of hypotension (blood pressure <90/60 mmHg) or bradycardia (heart rate <55 bpm), or symptoms of bradycardia or hypotension (dizziness, syncope) the dose will be reduced to the previous dose level. In case of serious bradycardia (heart rate <50 bpm), the treatment will be stopped until an acceptable heart rate (>55 bpm) is reached and propranolol will be restarted in the dose of the previous level. A patient can stop study treatment by withdrawing the informed consent at any time.
- 11c The tolerability will be assessed during weekly visits in the outpatient clinic. Each visit consists of a physical examination, blood draw for safety assessment (hematology, hepatic- and renal function), vital signs, electrocardiogram (ECG), toxicity assessment, concomitant medication registration and tumour response assessment. After the study treatment, a biopsy will be obtained to evaluate the histologic response to propranolol monotherapy. Monitoring of the study will be performed according to ICH GCP by the Clinical Research Monitor of the NKI or the person to whom the monitoring tasks have been delegated
- 11d Treatment with other beta blockade therapy or anticancer therapies are prohibited (except hormonal therapy for breast cancer).

Outcomes

12

Primary endpoint

The clinical response will be determined according to RECIST 1.1 criteria (PD is >20% increase in size, PR is >30% decrease in size, SD is in between while CR is no measurable disease).(26) A response is defined as CR, PR, or SD with an improvement in clinical characteristics, like thickness, erythema, necrosis or edema of the inflicted area. Documentation will be performed with colour photography, including a ruler to measure the size of the lesion. Radiologic assessment will only be done if the patient has radiologic evaluable disease at the beginning of the study treatment. If the study turns out to be positive, this treatment modality is highly interesting and should be tested further in a randomized trial.

Secondary endpoint

The histologic response on propranolol treatment is defined as difference in proliferation index. This will be assessed by measuring the change in immunohistochemistry staining of Ki-67 and the tumour activity between the post-treatment biopsy (obtained during surgery if applicable) and the diagnostic biopsy before the study treatment. A decrease of >30% of the Ki-67 staining will be considered as a positive histologic response.

Exploratory endpoints

To obtain additional data regarding the primary objectives, the percentage of adrenergic receptors (ADRB1, ADRB2, and ADRB3) in the pre-treatment biopsies will be measured with immunohistochemically staining and the correlation with the anti-tumour response of the angiosarcoma patients will be investigated.(13,20) With this correlation analysis, the predictive value of adrenergic receptor expression in tumour tissue on the anti-tumour response will be assessed. Furthermore, we plan to assess the drug sensitivity with and without different chemotherapy regimens in vitro. Finally, we will compare the PET response before start of treatment and at the end of propranolol treatment.

Participant timeline

13

Weekly study assessments

- Physical examination
- Laboratory exams
- ECG
- Tumor measurement





|                                                 |             |    |                                                                                                                                                                                                                                                                                                                                                                                                                                      |
|-------------------------------------------------|-------------|----|--------------------------------------------------------------------------------------------------------------------------------------------------------------------------------------------------------------------------------------------------------------------------------------------------------------------------------------------------------------------------------------------------------------------------------------|
| 1<br>2<br>3<br>4<br>5<br>6<br>7<br>8<br>9<br>10 | Sample size | 14 | An exact single-stage phase II design will be used with a one-sided significance level $\alpha$ of 0.05 and a power of 80%. The maximum response rate that would be of no interest was assumed to be 5% and the minimum required response rate 30%. A total of 14 patients will be included in the study. If 3 or more out of these 14 patients have a response as defined in the study endpoints, the study is considered positive. |
| 11<br>12<br>13<br>14<br>15                      | Recruitment | 15 | The sarcoma unit of the NKI was trained for the study. Patientenplatform sarcomen, DSSG and Anticancer Fund Belgium are also informed and will provide information to possible patients.                                                                                                                                                                                                                                             |

### Methods: Assignment of interventions (for controlled trials)

#### Allocation:

|                            |                                  |     |                |
|----------------------------|----------------------------------|-----|----------------|
| 19<br>20<br>21<br>22       | Sequence generation              | 16a | Not applicable |
| 23<br>24<br>25<br>26       | Allocation concealment mechanism | 16b | Not applicable |
| 27<br>28                   | Implementation                   | 16c | Not applicable |
| 29<br>30<br>31<br>32<br>33 | Blinding (masking)               | 17a | Not applicable |
|                            |                                  | 17b | Not applicable |

### Methods: Data collection, management, and analysis

|                                                                                  |                         |     |                                                                                                                                                                                                                                                                                                                                                                                                                                      |
|----------------------------------------------------------------------------------|-------------------------|-----|--------------------------------------------------------------------------------------------------------------------------------------------------------------------------------------------------------------------------------------------------------------------------------------------------------------------------------------------------------------------------------------------------------------------------------------|
| 36<br>37<br>38<br>39<br>40<br>41<br>42                                           | Data collection methods | 18a | Data collection will be performed according to the figure as stated in section 13.                                                                                                                                                                                                                                                                                                                                                   |
|                                                                                  |                         | 18b | The follow up data will also be recorded in the eCRF by the investigators of the study.                                                                                                                                                                                                                                                                                                                                              |
| 43<br>44<br>45<br>46                                                             | Data management         | 19  | The original results will also be recorded in the eCRF by the investigators of the study. The data entry will be supervised by the Clinical Research Monitor.                                                                                                                                                                                                                                                                        |
| 47<br>48<br>49<br>50<br>51<br>52<br>53<br>54<br>55<br>56<br>57<br>58<br>59<br>60 | Statistical methods     | 20a | An exact single-stage phase II design will be used with a one-sided significance level $\alpha$ of 0.05 and a power of 80%. The maximum response rate that would be of no interest was assumed to be 5% and the minimum required response rate 30%. A total of 14 patients will be included in the study. If 3 or more out of these 14 patients have a response as defined in the study endpoints, the study is considered positive. |
|                                                                                  |                         | 20b | Not applicable                                                                                                                                                                                                                                                                                                                                                                                                                       |
|                                                                                  |                         | 20c | Not applicable                                                                                                                                                                                                                                                                                                                                                                                                                       |

## Methods: Monitoring

- 1  
2  
3  
4  
5  
6  
7  
8  
9  
10  
11  
12  
13  
14  
15  
16  
17  
18  
19  
20  
21  
22  
23  
24  
25  
26  
27  
28  
29  
30  
31  
32  
33  
34  
35  
36  
37  
38  
39  
40  
41
- |                 |     |                                                                                                                                                                                                                                                                                                                                                                                                                                                                                                                                                                                                                                                                                                                                                                                                                                                             |
|-----------------|-----|-------------------------------------------------------------------------------------------------------------------------------------------------------------------------------------------------------------------------------------------------------------------------------------------------------------------------------------------------------------------------------------------------------------------------------------------------------------------------------------------------------------------------------------------------------------------------------------------------------------------------------------------------------------------------------------------------------------------------------------------------------------------------------------------------------------------------------------------------------------|
| Data monitoring | 21a | Monitoring of the study will be performed according to ICH GCP by the Clinical Research Monitor of the NKI or the person to whom the monitoring tasks have been delegated. Amongst others the following will be reviewed: compliance with the protocol, ICH GCP and all applicable regulatory requirements; consent procedures, including date of consent and signatures; study progress; (Serious) Adverse Events; completion of the (e)CRFs and verification of data against the source data; and storage, dispensing and accountability of study medication.<br>The Medical Ethical Committee of the NKI will review the study every year throughout the complete study duration. During this review, the committee will focus on monitoring of the safety of patients and evaluate the balance between the efficacy and the harmfulness of propranolol. |
|                 | 21b | An interim analysis is planned after the treatment of seven patients. If there are already three or more responses at this time point, the study will be stopped and stated positive. Otherwise an additional seven patients will be included. Results of the study will be shared and be submitted for publication in an international peer-reviewed journal.                                                                                                                                                                                                                                                                                                                                                                                                                                                                                              |
| Harms           | 22  | All adverse events will be recorded in the electronic case report forms (eCRF) during the weekly outpatient clinic visits. We will perform extra blood draws, ECGs and measurements of the vital signs during these visits for safety assessments. The recording of the adverse events will be done according to the National Cancer Institute Common Toxicity Criteria for Adverse Events (CTCAE) version 5.0.                                                                                                                                                                                                                                                                                                                                                                                                                                             |
| Auditing        | 23  | Frequency and procedures for auditing trial conduct will be done yearly by the MEC of the NKI and will be independent from investigators and the sponsor.                                                                                                                                                                                                                                                                                                                                                                                                                                                                                                                                                                                                                                                                                                   |

## Ethics and dissemination

- 42  
43  
44  
45  
46  
47  
48  
49  
50  
51  
52  
53  
54  
55  
56  
57  
58  
59  
60
- |                          |    |                                                                                                                                                                                                                                                                                                                                         |
|--------------------------|----|-----------------------------------------------------------------------------------------------------------------------------------------------------------------------------------------------------------------------------------------------------------------------------------------------------------------------------------------|
| Research ethics approval | 24 | Ethical approval was obtained from the Medical Ethical Committee of the Netherlands Cancer Institute.                                                                                                                                                                                                                                   |
| Protocol amendments      | 25 | Independent of the outcome, results of this study will be shared and submitted for publication in an international peer-reviewed journal. All essential documents (including patient files, the Investigator Study File, CRF's, amendments and electronic study data), data management and statistical files will be kept for 15 years. |

|    |                   |     |                                                                                                            |
|----|-------------------|-----|------------------------------------------------------------------------------------------------------------|
| 1  |                   |     |                                                                                                            |
| 2  | Consent or assent | 26a | Treating physicians will identify patients as possible candidates and                                      |
| 3  |                   |     | inform patients about the study. If patients agree to participate and                                      |
| 4  |                   |     | fulfil the selection criteria, patients will be included during an                                         |
| 5  |                   |     | outpatient clinic visit.                                                                                   |
| 6  |                   |     |                                                                                                            |
| 7  |                   | 26b | Not applicable                                                                                             |
| 8  |                   |     |                                                                                                            |
| 9  | Confidentiality   | 27  | The original results will also be recorded in the eCRF by the                                              |
| 10 |                   |     | investigators of the study. The data entry will be supervised by the                                       |
| 11 |                   |     | Clinical Research Monitor. The Medical Ethical Committee of the NKI                                        |
| 12 |                   |     | will review the study every year throughout the complete study                                             |
| 13 |                   |     | duration. During this review, the committee will focus on monitoring of                                    |
| 14 |                   |     | the safety of patients and evaluate the balance between the efficacy                                       |
| 15 |                   |     | and the harmfulness of propranolol.                                                                        |
| 16 |                   |     |                                                                                                            |
| 17 |                   |     |                                                                                                            |
| 18 | Declaration of    | 28  | No conflicts of interests to disclose related to this study                                                |
| 19 | interests         |     |                                                                                                            |
| 20 |                   |     |                                                                                                            |
| 21 |                   |     |                                                                                                            |
| 22 | Access to data    | 29  | Study investigators will have access to the final data. Results of the                                     |
| 23 |                   |     | study will be shared and be submitted for publication in an                                                |
| 24 |                   |     | international peer-reviewed journal.                                                                       |
| 25 |                   |     |                                                                                                            |
| 26 | Ancillary and     | 30  | The investigator has a liability insurance which is in accordance with                                     |
| 27 | post-trial care   |     | article 7 of the WMO.                                                                                      |
| 28 |                   |     | The AVL as sponsor of this study also has an insurance which is in                                         |
| 29 |                   |     | accordance with the legal requirements in the Netherlands (Article 7                                       |
| 30 |                   |     | WMO). This insurance provides cover for damage to research                                                 |
| 31 |                   |     | subjects through injury or death caused by the study. The insurance                                        |
| 32 |                   |     | applies to the damage that becomes apparent during the study or                                            |
| 33 |                   |     | within 4 years after the end of the study.                                                                 |
| 34 |                   |     |                                                                                                            |
| 35 |                   |     |                                                                                                            |
| 36 |                   |     |                                                                                                            |
| 37 | Dissemination     | 31a | Results of the study will be shared and be submitted for publication in                                    |
| 38 | policy            |     | an international peer-reviewed journal.                                                                    |
| 39 |                   |     |                                                                                                            |
| 40 |                   | 31b | Colleagues meeting the ICMJE criteria for authorship will become co-                                       |
| 41 |                   |     | author. No professional writers will be involved.                                                          |
| 42 |                   |     |                                                                                                            |
| 43 |                   | 31c | The study was registered through the Netherlands Trial Register (Trial                                     |
| 44 |                   |     | no. NL8118). <a href="https://www.trialregister.nl/trial/8118">https://www.trialregister.nl/trial/8118</a> |
| 45 |                   |     |                                                                                                            |
| 46 |                   |     |                                                                                                            |
| 47 | <b>Appendices</b> |     |                                                                                                            |
| 48 |                   |     |                                                                                                            |
| 49 | Informed consent  | 32  | Patient information folder in Dutch is attached                                                            |
| 50 | materials         |     |                                                                                                            |
| 51 |                   |     |                                                                                                            |
| 52 | Biological        | 33  | All data regarding the clinical records and biological specimens will be                                   |
| 53 | specimens         |     | stored anonymously for future research, if the patient gives consent in                                    |
| 54 |                   |     | the patient information folder.                                                                            |
| 55 |                   |     |                                                                                                            |

\*It is strongly recommended that this checklist be read in conjunction with the SPIRIT 2013 Explanation & Elaboration for important clarification on the items. Amendments to the protocol should be tracked and dated. The SPIRIT checklist is copyrighted by the SPIRIT

1 Group under the Creative Commons "[Attribution-NonCommercial-NoDerivs 3.0 Unported](#)"  
2 license.  
3  
4  
5  
6  
7  
8  
9  
10  
11  
12  
13  
14  
15  
16  
17  
18  
19  
20  
21  
22  
23  
24  
25  
26  
27  
28  
29  
30  
31  
32  
33  
34  
35  
36  
37  
38  
39  
40  
41  
42  
43  
44  
45  
46  
47  
48  
49  
50  
51  
52  
53  
54  
55  
56  
57  
58  
59  
60

For peer review only

# BMJ Open

**PropAngio study protocol: a neoadjuvant trial on the efficacy of propranolol monotherapy in cutaneous angiosarcoma**  
**A proof of principle study**

|                                 |                                                                                                                                                                                                                                                                                                                                                                                                                                                                                                                                                                                                                                                                                                                                                                                                                                                                                                                                                                                                          |
|---------------------------------|----------------------------------------------------------------------------------------------------------------------------------------------------------------------------------------------------------------------------------------------------------------------------------------------------------------------------------------------------------------------------------------------------------------------------------------------------------------------------------------------------------------------------------------------------------------------------------------------------------------------------------------------------------------------------------------------------------------------------------------------------------------------------------------------------------------------------------------------------------------------------------------------------------------------------------------------------------------------------------------------------------|
| Journal:                        | <i>BMJ Open</i>                                                                                                                                                                                                                                                                                                                                                                                                                                                                                                                                                                                                                                                                                                                                                                                                                                                                                                                                                                                          |
| Manuscript ID                   | bmjopen-2020-039449.R1                                                                                                                                                                                                                                                                                                                                                                                                                                                                                                                                                                                                                                                                                                                                                                                                                                                                                                                                                                                   |
| Article Type:                   | Protocol                                                                                                                                                                                                                                                                                                                                                                                                                                                                                                                                                                                                                                                                                                                                                                                                                                                                                                                                                                                                 |
| Date Submitted by the Author:   | 26-Jun-2020                                                                                                                                                                                                                                                                                                                                                                                                                                                                                                                                                                                                                                                                                                                                                                                                                                                                                                                                                                                              |
| Complete List of Authors:       | Heinhuis, Kimberley; Netherlands Cancer Institute, Medical Oncology and Pharmacy & Pharmacology<br>IJzerman, Nikki; Netherlands Cancer Institute, Medical oncology and Pharmacy & Pharmacology; Erasmus MC Cancer Centre, Medical Oncology<br>Koenen, Anne Miek; Netherlands Cancer Institute, Medical Oncology and Pharmacy & Pharmacology<br>van der Graaf, Winette; Radboudumc, Medical Oncology; Netherlands Cancer Institute, Medical oncology<br>Haas, Rick; Netherlands Cancer Institute, Radiotherapy<br>Beijnen, Jos; Netherlands Cancer Institute, Pharmacy & Pharmacology; Utrecht University, Pharmaceutical sciences<br>Huitema, Alwin; Netherlands Cancer Institute - Antoni van Leeuwenhoek Hospital, Department of Pharmacy & Pharmacology; University Medical Center Utrecht, Utrecht University, Department of Clinical Pharmacy van Houdt, Winan; Netherlands Cancer Institute, Surgical Oncology<br>Steeghs, Neeltje; Netherlands Cancer Institute - Antoni van Leeuwenhoek Hospital |
| <b>Primary Subject Heading</b>: | Oncology                                                                                                                                                                                                                                                                                                                                                                                                                                                                                                                                                                                                                                                                                                                                                                                                                                                                                                                                                                                                 |
| Secondary Subject Heading:      | Evidence based practice                                                                                                                                                                                                                                                                                                                                                                                                                                                                                                                                                                                                                                                                                                                                                                                                                                                                                                                                                                                  |
| Keywords:                       | ONCOLOGY, Adult oncology < ONCOLOGY, Sarcoma < ONCOLOGY, VASCULAR MEDICINE                                                                                                                                                                                                                                                                                                                                                                                                                                                                                                                                                                                                                                                                                                                                                                                                                                                                                                                               |
|                                 |                                                                                                                                                                                                                                                                                                                                                                                                                                                                                                                                                                                                                                                                                                                                                                                                                                                                                                                                                                                                          |

SCHOLARONE™  
Manuscripts

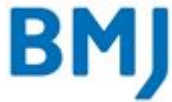

I, the Submitting Author has the right to grant and does grant on behalf of all authors of the Work (as defined in the below author licence), an exclusive licence and/or a non-exclusive licence for contributions from authors who are: i) UK Crown employees; ii) where BMJ has agreed a CC-BY licence shall apply, and/or iii) in accordance with the terms applicable for US Federal Government officers or employees acting as part of their official duties; on a worldwide, perpetual, irrevocable, royalty-free basis to BMJ Publishing Group Ltd ("BMJ") its licensees and where the relevant Journal is co-owned by BMJ to the co-owners of the Journal, to publish the Work in this journal and any other BMJ products and to exploit all rights, as set out in our [licence](#).

The Submitting Author accepts and understands that any supply made under these terms is made by BMJ to the Submitting Author unless you are acting as an employee on behalf of your employer or a postgraduate student of an affiliated institution which is paying any applicable article publishing charge ("APC") for Open Access articles. Where the Submitting Author wishes to make the Work available on an Open Access basis (and intends to pay the relevant APC), the terms of reuse of such Open Access shall be governed by a Creative Commons licence – details of these licences and which [Creative Commons](#) licence will apply to this Work are set out in our licence referred to above.

Other than as permitted in any relevant BMJ Author's Self Archiving Policies, I confirm this Work has not been accepted for publication elsewhere, is not being considered for publication elsewhere and does not duplicate material already published. I confirm all authors consent to publication of this Work and authorise the granting of this licence.

# PropAngio study protocol: a neoadjuvant trial on the efficacy of propranolol monotherapy in cutaneous angiosarcoma

*A proof of principle study*

Kimberley M Heinhuis<sup>1,5\*</sup>, Nikki S IJzerman<sup>1,2,5\*</sup>, Anne Miek Koenen<sup>3</sup>, Winette TA van der Graaf<sup>1</sup>, Rick L Haas<sup>4</sup>, Jos H Beijnen<sup>5,6</sup>, Alwin DR Huitema<sup>5,7</sup>, Winan J van Houdt<sup>3</sup>, Neeltje Steeghs<sup>1</sup>.

\*These authors contributed equally.

## Affiliations

1. Department of Medical Oncology, Netherlands Cancer Institute, Amsterdam, the Netherlands
2. Department of Medical Oncology, Erasmus MC Cancer Institute, Erasmus University Medical Center, Rotterdam, the Netherlands
3. Department of Surgical Oncology, Netherlands Cancer Institute, Amsterdam, the Netherlands
4. Department of Radiotherapy, the Netherlands Cancer Institute, Amsterdam, the Netherlands
5. Department of Pharmacy & Pharmacology, Netherlands Cancer Institute, Amsterdam, the Netherlands.
6. Department of Pharmaceutical Sciences, Utrecht University, Utrecht, the Netherlands
7. Department of Clinical Pharmacy, University Medical Center Utrecht, Utrecht University, Utrecht, the Netherlands

**Corresponding author:** Nikki S IJzerman; postal address; Plesmanlaan 121, 1066 CX Amsterdam, the Netherlands, phone number +31205126255; mail: N.IJzerman@nki.nl.

**Word count:** Abstract: 306, Manuscript: 2350.

**Keywords:** oncology; adult oncology; sarcoma; vascular medicine

## ABSTRACT

**Introduction:** Angiosarcoma is a rare and aggressive malignancy with a high metastatic potential and recurrence rate. Despite optimal treatment with surgery, with or without radiation, the prognosis remains poor and, therefore, new treatment strategies are warranted. Recently, propranolol has effectively been repurposed for the treatment of infantile hemangioma. Propranolol is a  $\beta$ -sparing antagonist of the  $\beta$ -adrenergic receptor, a receptor that is highly expressed in infantile hemangioma. Angiosarcoma has several similarities with hemangioma, including its high  $\beta$ -adrenergic receptor expression and the supposedly important role of VEGF in malignant growth. As a result, propranolol has been administered small-scale in individual angiosarcoma cases with promising results. The precise effect of propranolol, however, is not yet established.

**Methods and analysis:** The goal of this neoadjuvant window of opportunity study is to prospectively evaluate the activity of propranolol monotherapy in patients with cutaneous angiosarcoma. The neoadjuvant setting provides a good opportunity to rapidly evaluate both the clinical response and histological response, without a significant delay in standard anti-cancer treatment. Fourteen patients with primary, recurrent or metastatic cutaneous angiosarcoma will be included. Propranolol will be administered orally in an escalating dose during three to six weeks, before the initiation of standard treatment. The primary endpoint is clinical response according to RECIST, as measured on consecutive coloured photographs or CT/MRI. The histological response will be determined as secondary endpoint, comparing the difference in proliferation index before and after propranolol by measuring the change in immunohistochemistry staining of Ki-67. The study will be considered positive when at least 3 patients have a response to propranolol.

**Ethics and dissemination:** Ethical approval was obtained from the Medical Ethical Committee of the Netherlands Cancer Institute. Independent of the outcome, results of this study will be shared and submitted for publication in an international peer-reviewed journal.

**Trial registration number:** Registry through the Netherlands Trial Register (Trial no. NL8118).



## Strengths and limitations of this study

- The neoadjuvant setting provides the opportunity to evaluate the antitumor response of propranolol monotherapy without delaying the standard treatment.
- The propranolol dose will be escalated to optimize the safety profile of the treatment.
- As it is a window of opportunity study, the study duration will be relatively short.
- A limitation of the current design (proof of principle study), is the absence of randomisation.

For peer review only

## INTRODUCTION

Angiosarcoma is a rare and aggressive malignancy with a high metastatic potential. The estimated incidence of angiosarcoma is 0.4 per million patients per year, making it a very rare disease.[1] The standard of care for localised angiosarcoma is currently complete surgical resection with or without radiation. Unfortunately, despite the current standard of care, only 60% of patients with localized disease survive for more than five years.[2] Physicians and researchers are, therefore, in urgent need to find better treatment options for these patients.

Various additional drugs for systemic treatment have been investigated before.[2–4] Although the role of (neo)adjuvant chemotherapy remains controversial for localised disease, neoadjuvant chemotherapy is often administered for locally advanced angiosarcoma.[3,5–8] Several cytotoxic drugs, including anthracyclines, taxanes and gemcitabine, have shown activity in angiosarcoma in the locally advanced and metastatic setting, with overall response rates varying from 17 to 89%.[2–4] However, for the treatment of resectable angiosarcoma, none of the previous studies show a prolonged disease-free survival or overall survival.[3,5–10] Improved treatment in the neoadjuvant setting might reduce the local and distant recurrence rates by treating micrometastases at an early stage and by improving the resection margins, potentially leading to higher survival rates. As a result, new drugs are urgently needed to prolong the survival.

Propranolol hydrochloride, a synthetic  $\beta$ 3-sparing-adrenergic receptor antagonist, was registered by the Food and Drug Agency (FDA) decades ago for the treatment of hypertension. Drug repurposing is a drug development strategy focused on the reuse of existing drugs for new medical indications. Recently, propranolol has been repurposed and is now used in the treatment of infantile hemangioma. Infantile hemangioma is a benign vascular tumour and propranolol dosed 3 mg/kg led to a complete to near complete resolution in approximately 88% of the treated infants with infantile hemangioma.[11,12] The pharmacological effects of propranolol in infantile hemangioma are presumed to cause vasoconstriction, a decreased expression of vascular growth endothelial growth factor (VEGF) and basic fibroblast growth factor (bFGF), inhibition of migration and proliferation of tumour cells and induction of apoptosis of endothelial cells.[12–16] Angiosarcoma have several similarities with infantile hemangioma, including its high  $\beta$ -adrenergic receptor expression and the suggested important role of VEGF in malignant growth.[14,17,18]

Several small case reports and case series have confirmed the idea that propranolol could be repurposed to treat angiosarcoma. In these case reports, patients with locally advanced or metastatic angiosarcoma were treated with propranolol, in combination with various chemotherapy regimens, including combination therapy with cyclophosphamide, etoposide, paclitaxel and vinblastine-based chemotherapy. The dose of propranolol in combination therapy varied between 80 to 120 mg per day.[19–24] In one case there was a response after 1 week of propranolol monotherapy 40 mg twice a day (BID).[22] These doses of propranolol are much lower than the standard maintenance dose of 160-320 mg daily for patients with hypertension.[25] Furthermore, there was a reduction in the proliferative index of 34%, stabilization of tumour growth and less necrosis.[22] Additionally, one case described a patient with metastatic cardiac angiosarcoma who showed a long term response (>12 months) to propranolol monotherapy, while the mean survival time is only four months.[26]

Since literature regarding the activity and mode of action of propranolol as a single agent for angiosarcoma is scarce, our aim is to evaluate the activity of propranolol monotherapy in patients with primary, recurrent or metastatic cutaneous angiosarcoma before they proceed to their standard anti-cancer treatment. The neoadjuvant setting provides a good opportunity to rapidly evaluate both the clinical and histological response, without delaying the standard anti-cancer treatment. Additional advantages of propranolol therapy would be the ease of use and the relatively mild toxicity profile. If this study turns out to be positive, further (randomized) clinical trials are thereby substantiated and highly recommended.

## **METHODS AND ANALYSIS**

### **Aim and objectives**

The aim of this study is to investigate the effect of neoadjuvant propranolol monotherapy in patients with primary, recurrent or metastatic cutaneous angiosarcoma, before they proceed to their standard anti-cancer treatment (e.g. isolated limb perfusion, chemotherapy, targeted therapy, surgical resection or radiotherapy). The primary objective is to determine the clinical response of propranolol monotherapy and the histologic response will be evaluated as secondary objective.

### **Study design and study treatment**

This is a prospective proof of principle study with neoadjuvant propranolol monotherapy in cutaneous angiosarcoma patients. We will use the neoadjuvant window as an opportunity to explore the activity of propranolol monotherapy, without delaying the standard treatment. The duration of treatment will be three to six weeks. In this single arm trial, angiosarcoma patients will be treated with propranolol monotherapy in an inpatient escalating dose, which will be adjusted to the tolerability of propranolol. The treatment plan of propranolol is provided in *Table 1*. The treatment plan was designed based on doses used in previous literature [15,21,24,26] and not exceeding the maximum maintenance dose of 320 mg/day for the registered indication hypertension (maximum daily dose in our study 240 mg/day).[25] In case of hypotension (blood pressure <90/60 mmHg) or bradycardia (heart rate <55 bpm), or symptoms of bradycardia or hypotension (dizziness, syncope) the dose will be reduced to the previous dose level. In case of serious bradycardia (heart rate <50 bpm), the treatment will be stopped until an acceptable heart rate (>55 bpm) is reached and propranolol will be restarted in the dose of the previous level.

*Table 1. Propranolol treatment plan.*

| <b>Dose escalation scheme</b>                   |                   |              |
|-------------------------------------------------|-------------------|--------------|
| <b>Period</b>                                   | <b>Dose level</b> | <b>Dose</b>  |
| Day 1 – Day 7                                   | 1*                | 2x/day 40 mg |
| Day 8 – Day 14                                  | 2*                | 2x/day 80 mg |
| Day 15 – Day of surgery or biopsy               | 3*                | 3x/day 80 mg |
| <b>Tapering off scheme after surgery/biopsy</b> |                   |              |
| <b>Period</b>                                   | <b>Dose</b>       |              |
| Day 1 - Day 7                                   | 2x/day 80 mg      |              |
| Day 8 - Day 14                                  | 2x/day 40 mg      |              |

\*All patients start on day 1 with dose level 1.

The tolerability will be assessed during weekly visits in the outpatient clinic (*figure 1*). Each visit consists of a physical examination, blood draw for safety assessment (hematology, hepatic- and renal function), vital signs, electrocardiogram (ECG), toxicity assessment, concomitant medication registration and tumour response assessment. After the study treatment, a biopsy will be obtained to evaluate the histologic response to propranolol monotherapy. Propranolol will be tapered off after the biopsy, to prevent withdrawal symptoms (*table 1*).

1  
2  
3  
4  
5  
6  
7  
8  
9  
10  
11  
12  
13  
14  
15  
16  
17  
18  
19  
20  
21  
22  
23  
24  
25  
26  
27  
28  
29  
30  
31  
32  
33  
34  
35  
36  
37  
38  
39  
40  
41  
42  
43  
44  
45  
46  
47  
48  
49  
50  
51  
52  
53  
54  
55  
56  
57  
58  
59  
60

For peer review only

## Patient selection

The study population consists of patients with primary, recurrent or metastatic cutaneous angiosarcoma, including angiosarcoma of the breast (radiation induced). Only patients with cutaneous angiosarcoma can participate, since these tumours are easily measurable on coloured photographs for clinical response evaluation. Patients are eligible if they are at least 18 years old; have a good performance status (world health organization (WHO-PS) of 0-2); have an adequate blood count, kidney and renal function; have a window of at least three weeks between their diagnosis and the start of the standard anti-cancer treatment and have evaluable disease according to the Response Evaluation Criteria in Solid Tumours (RECIST) 1.1 criteria. Patients with primary visceral angiosarcoma, contraindications for  $\beta$ -blockade therapy or current treatment with  $\beta$ -blockade therapy (both selective and non-selective  $\beta$ -blockade therapy) or other anti-cancer treatment are excluded.

## Sample size calculation

An exact single-stage phase II design will be used with a one-sided significance level  $\alpha$  of 0.05 and a power of 80%. The maximum response rate that would be of no interest was assumed to be 5% and the minimum required response rate 30%. A total of 14 patients will be included in the study. If 3 or more out of these 14 patients have a response as defined in the study endpoints, the study is considered positive.

## Study endpoints

### *Primary endpoint*

The clinical response will be determined according to RECIST 1.1 criteria (PD is  $>20\%$  increase in size, PR is  $>30\%$  decrease in size, SD is in between while CR is no measurable disease).[27] A response is defined as CR, PR, or SD with an improvement in clinical characteristics, like thickness, erythema, necrosis or edema of the inflicted area. Documentation will be performed with colour photography, including a ruler to measure the size of the lesion. Radiologic assessment will only be done if the patient has radiologic evaluable disease at the beginning of the study treatment. If the study turns out to be positive, this treatment modality is highly interesting and should be tested further in a randomized trial.

### ***Secondary endpoint***

The histologic response on propranolol treatment is defined as difference in proliferation index. This will be assessed by measuring the change in immunohistochemistry staining of Ki-67 and the tumour activity between the post-treatment biopsy (obtained during surgery if applicable) and the diagnostic biopsy before the study treatment. A decrease of >30% of the Ki-67 staining will be considered as a positive histologic response.

### ***Exploratory endpoints***

To obtain additional data regarding the primary objectives, the percentage of adrenergic receptors ( $\beta$ 1-AR,  $\beta$ 2-AR,  $\beta$ 3-AR) in the pre-treatment biopsies will be measured with immunohistochemically staining and the correlation with the anti-tumour response of the angiosarcoma patients will be investigated.[13,22] With this correlation analysis, the predictive value of adrenergic receptor expression in tumour tissue on the anti-tumour response will be assessed. Finally, we will compare the PET response before start of treatment and at the end of propranolol treatment.

### **Study logistics**

#### ***Patient recruitment and study duration***

Treating physicians will identify patients as possible candidates and inform patients about the study. If patients agree to participate and fulfil the selection criteria, patients will be included during an outpatient clinic visit. As this is a monocenter study, all patients will be included in the Netherlands Cancer Institute (NKI). Approximately 20 new angiosarcoma patients are seen in the NKI yearly. As a result, the expected duration of the study is two years. Enrolment started on 27 December 2019.

#### ***Safety assessments***

All adverse events will be recorded in the electronic case report forms (eCRF) during the weekly outpatient clinic visits. We will perform extra blood draws, ECGs and measurements of the vital signs during these visits for safety assessments. The recording of the adverse events will be done

1  
2  
3 according to the National Cancer Institute Common Toxicity Criteria for Adverse Events  
4 (CTCAE) version 5.0.  
5  
6  
7

### 8 *Data management*

9  
10 The original results will also be recorded in the eCRF by the investigators of the study. The data  
11 entry will be supervised by the Clinical Research Monitor.  
12  
13  
14

### 15 *Study monitoring*

16  
17 Monitoring of the study will be performed according to ICH GCP by the Clinical Research Monitor  
18 of the NKI or the person to whom the monitoring tasks have been delegated. Amongst others the  
19 following will be reviewed: compliance with the protocol, ICH GCP and all applicable regulatory  
20 requirements; consent procedures, including date of consent and signatures; study progress;  
21 (Serious) Adverse Events; completion of the (e)CRFs and verification of data against the source  
22 data; and storage, dispensing and accountability of study medication.  
23  
24  
25  
26

27 The Medical Ethical Committee of the NKI will review the study every year throughout the  
28 complete study duration. During this review, the committee will focus on monitoring of the safety of  
29 patients and evaluate the balance between the efficacy and the harmfulness of propranolol.  
30  
31  
32  
33

### 34 *Termination of the study*

35  
36 An interim analysis is planned after the treatment of seven patients. If there are already three or  
37 more responses at this time point, the study will be stopped and stated positive. Otherwise an  
38 additional seven patients will be included. Results of the study will be shared and be submitted for  
39 publication in an international peer-reviewed journal.  
40  
41  
42  
43

### 44 *Patient and public involvement statement*

45  
46 The trial protocol and other trial documents were developed in collaboration with the Dutch  
47 sarcoma patient advocacy group. They evaluated the specific patient need for this trial. They fully  
48 support this trial and the concept of exploring drug-repurposing strategies to improve outcome in  
49 sarcoma. The patient advocacy group will be informed about the progress of the study and the  
50 study time lines.  
51  
52  
53  
54  
55  
56  
57  
58  
59  
60



1  
2  
3 The study is funded by a Belgian non-profit organisation: the Anticancer Fund. Their mission is  
4 to complement current cancer care with patient-first thinking and a focus on evidence-based  
5 potential for new treatments. Financially, the Anticancer Fund is completely dependent on  
6 donations and private funding. The Anticancer Fund supports diverse clinical trials, mainly in  
7 under-prioritised treatment groups (such as in rare tumours), with non-conventional therapies and  
8 repurposed drugs. The trial was registered in the Netherlands Trial Register (NL71090.031.19).  
9  
10  
11  
12  
13  
14

### 15 **Ethics and dissemination**

16 Ethical approval was obtained from the Medical Ethical Committee of the Netherlands Cancer  
17 Institute. Independent of the outcome, results of this study will be shared and submitted for  
18 publication in an international peer-reviewed journal.  
19  
20  
21

22 All essential documents (including patient files, the Investigator Study File, CRF's and electronic  
23 study data), data management and statistical files will be kept for 15 years.  
24  
25  
26

### 27 **Summary**

28 Angiosarcoma is an extremely rare and aggressive malignancy with a high metastatic potential and  
29 a dismal prognosis. The current standard treatment cannot sufficiently manage the disease.  
30 Therefore, new strategies are warranted. Drug repurposing is a process of developing approved  
31 drugs for new medical indications. A strong rationale for repurposing of propranolol for the  
32 treatment of angiosarcoma patients exists. The precise effect of propranolol monotherapy is not  
33 yet established. In this study, we will therefore address the question about the efficacy of  
34 propranolol as neoadjuvant monotherapy in patients with cutaneous angiosarcoma. If this study  
35 shows positive results, further clinical trials are needed to establish the role of propranolol in the  
36 treatment of angiosarcoma, possibly even in combination with other agents such as chemotherapy,  
37 targeted therapy or immunotherapy.  
38  
39  
40  
41  
42  
43  
44  
45  
46  
47

### 48 **Acknowledgments**

49 The authors would like to thank the Dutch sarcoma patient advocacy group (Patiëntenplatform  
50 Sarcomen) and the Anticancer Fund for their contributions to the study.  
51  
52  
53  
54  
55  
56  
57  
58  
59  
60

**Authors' contributions**

KH, NIJ, AMK, WG, RH, JB, AH, WH and NS each made substantial contributions to the conception or design of the study protocol. NIJ and KH wrote the first draft of the protocol and this paper. AMK, WG, RH, WH, JB, AH and NS provided critical input regarding the design of the study or study logistics. KH, NIJ, AMK, WG, RH, JB, AH, WH and NS revised the protocol critically and approved the final version to be published.

**Funding statement**

This work was supported by Anticancer Fund from Belgium, grant number 40117.

**Competing interest statements**

The authors declare that they have no conflicts of interest related to this study.

## REFERENCES

1. Rouhani P, Fletcher CD, Devesa SS TJ, et al. Cutaneous soft tissue sarcoma incidence patterns in the U.S. : an analysis of 12,114 cases. *Cancer* 2008;113(3):616–27.
2. Young RJ, Brown NJ, Reed MW, et al. Angiosarcoma. *Lancet Oncol* 2010;11(10):983–91.
3. Oxenberg J, Khushalani NI, Salerno KE, et al. Neoadjuvant chemotherapy for primary cutaneous/soft tissue angiosarcoma: Determining tumor behavior prior to surgical resection. *J Surg Oncol* 2015;111(7):829–33.
4. Stacchiotti S, Palassini E, Sanfilippo R, et al. Gemcitabine in advanced angiosarcoma: a retrospective case series analysis from the Italian Rare Cancer Network. *Ann Oncol* 2012;23(2):501–8.
5. DeMartelaere SL, Roberts D, Burgess MA, et al. Neoadjuvant chemotherapy–specific and overall treatment outcomes in patients with cutaneous angiosarcoma of the face with periorbital involvement. *Head Neck* 2008 May;30(5):639–46.
6. Fayette J, Martin E, Piperno-Neumann S, et al. Angiosarcomas, a heterogeneous group of sarcomas with specific behavior depending on primary site: a retrospective study of 161 cases. *Ann Oncol* 2007;18(12):2030–6.
7. Guadagnolo BA, Zagars GK, Araujo D, et al. Outcomes after definitive treatment for cutaneous angiosarcoma of the face and scalp. *Head Neck* 2011;33(5):661–7.
8. Sinnamon AJ, Neuwirth MG, McMillan MT, et al. A prognostic model for resectable soft tissue and cutaneous angiosarcoma. *J Surg Oncol* 2016;114(5):557–63.
9. Li H, Yang S, Chen H, et al. Survival after heart transplantation for non-metastatic primary cardiac sarcoma. *J Cardiothorac Surg* 2016;11(1):145.
10. Abu Saleh WK, Ramlawi B, Shapira OM, et al. Improved Outcomes With the Evolution of a Neoadjuvant Chemotherapy Approach to Right Heart Sarcoma. *Ann Thorac Surg* 2017 Jul;104(1):90–6.
11. Léauté-Labrèze C, Hoeger P, Mazereeuw-Hautier J, et al. A Randomized, Controlled Trial of Oral Propranolol in Infantile Hemangioma. *N Engl J Med* 2015 Feb 19;372(8):735–46.
12. Léauté-Labrèze C, de la Roque ED, Hubiche T, et al. A. Propranolol for Severe Hemangiomas of Infancy. *N Engl J Med* 2008;358(24):2649–51.
13. Chisholm KM, Chang KW, Truong MT, et al.  $\beta$ -Adrenergic receptor expression in vascular tumors. *Mod Pathol* 2012;25(11):1446–51.

14. Stiles JM, Amaya C, Rains S, et al. Targeting of beta adrenergic receptors results in therapeutic efficacy against models of hemangioendothelioma and angiosarcoma. *PLoS One* 2013;8(3):e60021.
15. Amaya CN, Perkins M, Belmont A, et al. Non-selective beta blockers inhibit angiosarcoma cell viability and increase progression free- and overall-survival in patients diagnosed with metastatic angiosarcoma. *Oncoscience* 2018;5(3–4):109–19.
16. Pasquier E, Ciccolini J, Carre M, et al. Propranolol potentiates the anti-angiogenic effects and anti-tumor efficacy of chemotherapy agents: implication in breast cancer treatment. *Oncotarget* 2011;2(10):797–809.
17. Greenberger S, Bischoff J. Pathogenesis of infantile haemangioma. *Br J Dermatol* 2013;169(1):12–19.
18. Itakura E, Yamamoto H, Oda Y, Tsuneyoshi M. Detection and characterization of vascular endothelial growth factors and their receptors in a series of angiosarcomas. *J Surg Oncol* 2008;97:74–81.
19. Daguzé J, Saint-Jean M, Peuvrel L, et al. Visceral metastatic angiosarcoma treated effectively with oral cyclophosphamide combined with propranolol. *JAAD Case Reports* 2016;2(6):497–9.
20. Pasquier E, André N, Street J, et al. Effective Management of Advanced Angiosarcoma by the Synergistic Combination of Propranolol and Vinblastine-based Metronomic Chemotherapy: A Bench to Bedside Study. *EBioMedicine* 2016;6:87–95.
21. Chow W, Amaya CN, Rains S, et al. Growth Attenuation of Cutaneous Angiosarcoma With Propranolol-Mediated  $\beta$ -Blockade. *JAMA dermatology* 2015;151(11):1226–9.
22. Pramanik R, Gogia A, Malik PS, et al. Metastatic Primary Angiosarcoma of the Breast: Can We Tame It the Metronomic Way. *Indian J Med Paediatr Oncol* 2017;38(2):228–31.
23. Banavali S, Pasquier E, Andre N. Targeted therapy with propranolol and metronomic chemotherapy combination: sustained complete response of a relapsing metastatic angiosarcoma. *Ecancermedicalscience* 2015;9:499.
24. Daguzé J, Saint-Jean M, Dréno B. Large nose angiosarcoma treated effectively with oral cyclophosphamide combined with propranolol. *J Eur Acad Dermatology Venereol* 2018;32(2):e52–4.
25. European Medicines Agency. Propranolol 40 mg film-coated tablets - Summary of Product

- 1  
2  
3 Characteristics (SmPC) - (eMC) [Internet]. Available from:  
4 <https://www.medicines.org.uk/emc/product/2904/smpc>  
5  
6  
7 26. Galván DC, Ayyappan AP, Bryan BA. Regression of primary cardiac angiosarcoma and  
8 metastatic nodules following propranolol as a single agent treatment. *Oncoscience*  
9 2018;5(9–10):262.  
10  
11 27. Schwartz LH, Seymour L, Litière S, et al. RECIST 1.1 - Standardisation and disease-  
12 specific adaptations: Perspectives from the RECIST Working Group. *Eur J Cancer*.  
13 2016;62(Jul):138–45.  
14  
15  
16  
17  
18  
19  
20

## 21 **Legends**

22 *Figure 1. Study assessments.* Figure 1 gives an overview of the study assessments, which are  
23 planned at baseline, during study treatment or when the standard treatment is initiated.  
24  
25  
26  
27  
28  
29  
30  
31  
32  
33  
34  
35  
36  
37  
38  
39  
40  
41  
42  
43  
44  
45  
46  
47  
48  
49  
50  
51  
52  
53  
54  
55  
56  
57  
58  
59  
60

1  
2  
3  
4  
5  
6  
7  
8  
9  
10  
11  
12  
13  
14  
15  
16  
17  
18  
19  
20  
21  
22  
23  
24  
25  
26  
27  
28  
29  
30  
31  
32  
33  
34  
35  
36  
37  
38  
39  
40  
41  
42  
43  
44  
45  
46  
47  
48  
49  
50  
51  
52  
53  
54  
55  
56  
57  
58  
59  
60

**Baseline**

- Informed consent
- Biopsy
- Physical exam
- Laboratory exams
- ECG
- Tumor measurement



Start propranolol 

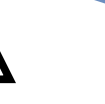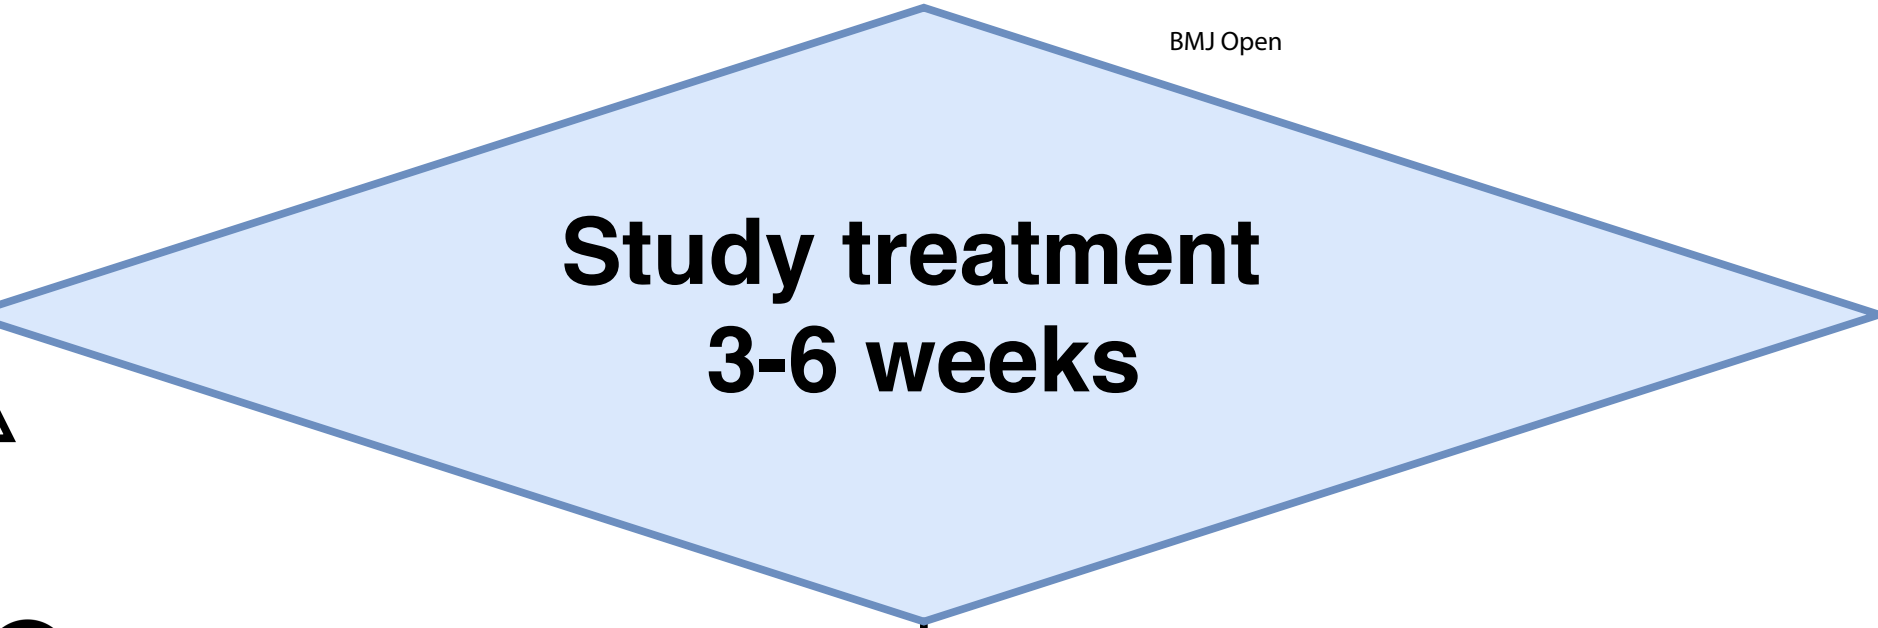

**Study treatment  
3-6 weeks**

Weekly study assessments:

- Physical examination
- Laboratory exams
- ECG
- Tumor measurement

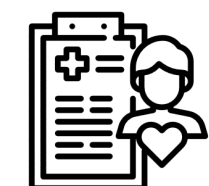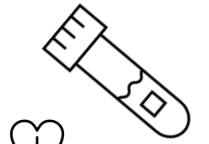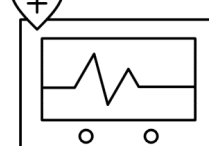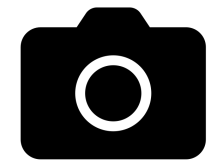

**Standard treatment**

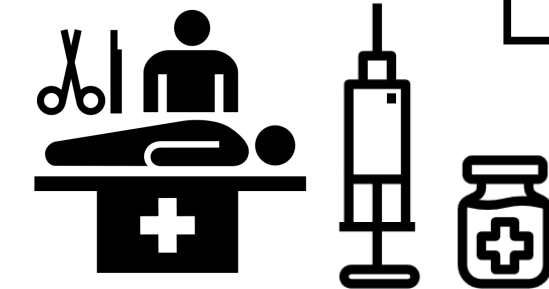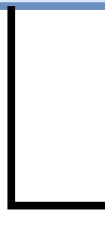

Tapering off propranolol

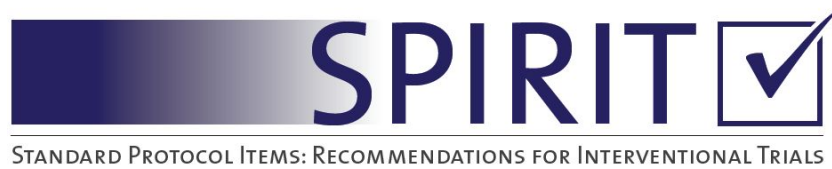

SPIRIT 2013 Checklist: Recommended items to address in a clinical trial protocol and related documents\*

| Section/item                      | Item No | Description                                                                                                                       |
|-----------------------------------|---------|-----------------------------------------------------------------------------------------------------------------------------------|
| <b>Administrative information</b> |         |                                                                                                                                   |
| Title                             | 1       | PropAngio: a neoadjuvant trial on the efficacy of propranolol monotherapy in cutaneous angiosarcoma<br>A proof of principle study |
| Trial registration                | 2a      | Registry through the Netherlands Trial Register (Trial no. NL8118).                                                               |
|                                   | 2b      | <a href="https://www.trialregister.nl/trial/8118">https://www.trialregister.nl/trial/8118</a>                                     |
| Protocol version                  | 3       | Version 2.0, 7 October 2019                                                                                                       |
| Funding                           | 4       | The study is funded by the Anticancer Fund from Belgium.                                                                          |

1  
2 Roles and responsibilities 5a Kimberley M. Heinhuis<sup>1,5\*</sup>, Nikki S. IJzerman<sup>1,2,5\*</sup>, Anne Miek Koenen<sup>3</sup>,  
3 Winette T.A. van der Graaf<sup>1</sup>, Rick L. Haas<sup>4</sup>, Jos H. Beijnen<sup>5,6</sup>, Alwin  
4 D.R. Huitema<sup>5,7</sup>, Winan J. van Houdt<sup>3</sup>, Neeltje Steeghs<sup>1</sup>.

5 \*These authors contributed equally.

6  
7  
8 Affiliations

9 1. Department of Medical Oncology, Netherlands Cancer  
10 Institute, Amsterdam, the Netherlands

11 2. Department of Medical Oncology, Erasmus MC Cancer  
12 Institute, Erasmus University Medical Center, Rotterdam, the  
13 Netherlands

14 3. Department of Surgical Oncology, Netherlands Cancer  
15 Institute, Amsterdam, the Netherlands

16 4. Department of Radiotherapy, the Netherlands Cancer Institute,  
17 Amsterdam, the Netherlands

18 5. Department of Pharmacy & Pharmacology, Netherlands  
19 Cancer Institute, Amsterdam, the Netherlands.

20 6. Department of Pharmaceutical Sciences, Utrecht University,  
21 Utrecht, the Netherlands

22 7. Department of Clinical Pharmacy, University Medical Center  
23 Utrecht, Utrecht University, Utrecht, the Netherlands

24  
25  
26 Authors' contributions

27 KH, NIJ, AMK, WG, RH, JB, AH, WH and NS each made substantial  
28 contributions to the conception or design of the study protocol. NIJ  
29 and KH wrote the first draft of the protocol and this paper. AMK, WG,  
30 RH, WH, JB, AH and NS provided critical input regarding the design  
31 of the study or study logistics. KH, NIJ, AMK, WG, RH, JB, AH, WH  
32 and NS revised the protocol critically and approved the final version to  
33 be published.

34  
35  
36 5b Anticancer Fund Belgium, Liese Vandeborne, Research Manager, +32  
37 2 268 48 16, [www.anticancerfund.org](http://www.anticancerfund.org), Boechoutlaan 221, 1853  
38 Strombeek-Bever, Belgium.

39  
40  
41 5c The study sponsor and funders will not have ultimate authority in  
42 study design; collection, management, analysis, and interpretation of  
43 data; writing of the report; and the decision to submit the report for  
44 publication.

45  
46  
47 5d Not applicable.  
48  
49  
50  
51  
52  
53  
54  
55  
56  
57  
58  
59  
60



## Introduction

### Background and rationale

6a

Angiosarcoma is a rare and aggressive malignancy with a high metastatic potential.(1) The standard of care for localised angiosarcoma is currently complete surgical resection with or without radiation. Unfortunately, despite the current standard of care, only 60% of patients with localized disease survive for more than five years.(2)

Several cytotoxic drugs, including anthracyclines, taxanes and gemcitabine, have shown activity in angiosarcoma in the locally advanced and metastatic setting, with overall response rates varying from 17 to 89%.(2–4) However, for the treatment of resectable angiosarcoma, none of the previous studies show a prolonged disease-free survival or overall survival.(3,5–10) Improved treatment in the neoadjuvant setting might reduce the local and distant recurrence rates by treating micrometastases at an early stage and by improving the resection margins, potentially leading to higher survival rates. As a result, new drugs are urgently needed to prolong the survival.

Recently, propranolol has been repurposed and is now successfully used in the treatment of hemangioma.(11,12) Angiosarcoma have several similarities with hemangioma, including its high  $\beta$ -adrenergic receptor expression and the supposedly important role of VEGF in malignant growth.(11,17)

Several small case reports and case series have confirmed the idea that propranolol could be repurposed to treat angiosarcoma. The dose of propranolol in combination therapy varied between 80 to 120 mg per day.(18–23) These doses of propranolol are much lower than the standard maintenance dose of 160-320 mg daily for patients with hypertension.(24)

Since literature regarding the activity and mode of action of propranolol as a single agent for angiosarcoma is scarce, our aim is to evaluate the activity of propranolol monotherapy in patients with primary, recurrent or metastatic cutaneous angiosarcoma before they proceed to their standard anti-cancer treatment. The neoadjuvant setting provides a good opportunity to rapidly evaluate both the clinical and histological response, without delaying the standard anti-cancer treatment. Additional advantages of propranolol therapy would be the ease of use and the relatively mild toxicity profile. If this study turns out to be positive, further (randomized) clinical trials are thereby substantiated and highly recommended.

*[Reference numbers refer to references list in paper].*

6b

This is a proof of principle study with no comparator because there is no current standard neoadjuvant treatment for angiosarcoma.

- 1  
2  
3  
4  
5  
6  
7  
8  
9  
10  
11  
12  
13  
14  
15  
16  
17  
18  
19
- Objectives 7 The aim of this study is to investigate the effect of neoadjuvant propranolol monotherapy in patients with primary, recurrent or metastatic cutaneous angiosarcoma, before they proceed to their standard anti-cancer treatment (e.g. isolated limb perfusion, chemotherapy, targeted therapy, surgical resection or radiotherapy). The primary objective is to determine the clinical response of propranolol monotherapy and the histologic response will be evaluated as secondary objective.
- Trial design 8 This is a single armed, phase II, proof of principle study.

20  
21  
22  
23  
24  
25  
26  
27  
28  
29  
30  
31  
32  
33  
34  
35  
36  
37  
38  
39  
40  
41  
42

### Methods: Participants, interventions, and outcomes

- Study setting 9 This is a monocenter study and all patients will be treated in the Netherlands Cancer institute in Amsterdam, Antoni van Leeuwenhoek hospital.
- Eligibility criteria 10 The study population consists of patients with primary, recurrent or metastatic cutaneous angiosarcoma, including angiosarcoma of the breast. Only patients with cutaneous angiosarcoma can participate, since these tumours are easily measurable on coloured photographs for clinical response evaluation. Patients are eligible if they are at least 18 years old; have a good performance status (world health organization (WHO-PS) of 0-2); have an adequate blood count, kidney and renal function; have a window of at least three weeks between their diagnosis and the start of the standard anti-cancer treatment and have evaluable disease according to the Response Evaluation Criteria in Solid Tumours (RECIST) 1.1 criteria. Patients with primary visceral angiosarcoma, contraindications for  $\beta$ -blockade therapy or current treatment with  $\beta$ -blockade therapy (both selective and non-selective  $\beta$ -blockade therapy) or other anti-cancer treatment are excluded.
- Interventions 11a All patients will follow the same scheme (single armed study):

| <b>Dose escalation scheme</b>                   |                   |              |
|-------------------------------------------------|-------------------|--------------|
| <b>Period</b>                                   | <b>Dose level</b> | <b>Dose</b>  |
| Day 1 – Day 7                                   | 1*                | 2x/day 40 mg |
| Day 8 – Day 14                                  | 2*                | 2x/day 80 mg |
| Day 15 – Day of surgery or biopsy               | 3*                | 3x/day 80 mg |
| <b>Tapering off scheme after surgery/biopsy</b> |                   |              |
| <b>Period</b>                                   | <b>Dose</b>       |              |
| Day 1 - Day 7                                   | 2x/day 80 mg      |              |
| Day 8 - Day 14                                  | 2x/day 40 mg      |              |

- 1  
2  
3  
4  
5  
6  
7  
8  
9  
10  
11  
12  
13  
14  
15  
16  
17  
18  
19  
20  
21  
22  
23  
24  
25  
26  
27  
28  
29  
30  
31  
32  
33  
34  
35  
36  
37  
38  
39  
40  
41  
42  
43  
44  
45  
46  
47  
48  
49  
50  
51  
52  
53  
54  
55  
56  
57  
58  
59  
60
- 11b In case of hypotension (blood pressure <90/60 mmHg) or bradycardia (heart rate <55 bpm), or symptoms of bradycardia or hypotension (dizziness, syncope) the dose will be reduced to the previous dose level. In case of serious bradycardia (heart rate <50 bpm), the treatment will be stopped until an acceptable heart rate (>55 bpm) is reached and propranolol will be restarted in the dose of the previous level. A patient can stop study treatment by withdrawing the informed consent at any time.
- 11c The tolerability will be assessed during weekly visits in the outpatient clinic. Each visit consists of a physical examination, blood draw for safety assessment (hematology, hepatic- and renal function), vital signs, electrocardiogram (ECG), toxicity assessment, concomitant medication registration and tumour response assessment. After the study treatment, a biopsy will be obtained to evaluate the histologic response to propranolol monotherapy. Monitoring of the study will be performed according to ICH GCP by the Clinical Research Monitor of the NKI or the person to whom the monitoring tasks have been delegated
- 11d Treatment with other beta blockade therapy or anticancer therapies are prohibited (except hormonal therapy for breast cancer).

## Outcomes

## 12 Primary endpoint

The clinical response will be determined according to RECIST 1.1 criteria (PD is >20% increase in size, PR is >30% decrease in size, SD is in between while CR is no measurable disease).(26) A response is defined as CR, PR, or SD with an improvement in clinical characteristics, like thickness, erythema, necrosis or edema of the inflicted area. Documentation will be performed with colour photography, including a ruler to measure the size of the lesion. Radiologic assessment will only be done if the patient has radiologic evaluable disease at the beginning of the study treatment. If the study turns out to be positive, this treatment modality is highly interesting and should be tested further in a randomized trial.

## Secondary endpoint

The histologic response on propranolol treatment is defined as difference in proliferation index. This will be assessed by measuring the change in immunohistochemistry staining of Ki-67 and the tumour activity between the post-treatment biopsy (obtained during surgery if applicable) and the diagnostic biopsy before the study treatment. A decrease of >30% of the Ki-67 staining will be considered as a positive histologic response.

## Exploratory endpoints

To obtain additional data regarding the primary objectives, the percentage of adrenergic receptors (ADRB1, ADRB2, and ADRB3) in the pre-treatment biopsies will be measured with immunohistochemically staining and the correlation with the anti-tumour response of the angiosarcoma patients will be investigated.(13,20) With this correlation analysis, the predictive value of adrenergic receptor expression in tumour tissue on the anti-tumour response will be assessed. Furthermore, we plan to assess the drug sensitivity with and without different chemotherapy regimens in vitro. Finally, we will compare the PET response before start of treatment and at the end of propranolol treatment.

## Participant timeline

## 13

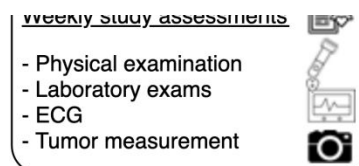

|                                                 |             |    |                                                                                                                                                                                                                                                                                                                                                                                                                                      |
|-------------------------------------------------|-------------|----|--------------------------------------------------------------------------------------------------------------------------------------------------------------------------------------------------------------------------------------------------------------------------------------------------------------------------------------------------------------------------------------------------------------------------------------|
| 1<br>2<br>3<br>4<br>5<br>6<br>7<br>8<br>9<br>10 | Sample size | 14 | An exact single-stage phase II design will be used with a one-sided significance level $\alpha$ of 0.05 and a power of 80%. The maximum response rate that would be of no interest was assumed to be 5% and the minimum required response rate 30%. A total of 14 patients will be included in the study. If 3 or more out of these 14 patients have a response as defined in the study endpoints, the study is considered positive. |
| 11<br>12<br>13<br>14<br>15                      | Recruitment | 15 | The sarcoma unit of the NKI was trained for the study. Patientenplatform sarcomen, DSSG and Anticancer Fund Belgium are also informed and will provide information to possible patients.                                                                                                                                                                                                                                             |

### Methods: Assignment of interventions (for controlled trials)

#### Allocation:

|                                                          |                                  |     |                |
|----------------------------------------------------------|----------------------------------|-----|----------------|
| 19<br>20<br>21<br>22<br>23<br>24<br>25<br>26<br>27<br>28 | Sequence generation              | 16a | Not applicable |
| 23<br>24<br>25<br>26                                     | Allocation concealment mechanism | 16b | Not applicable |
| 27<br>28                                                 | Implementation                   | 16c | Not applicable |
| 29<br>30<br>31<br>32<br>33                               | Blinding (masking)               | 17a | Not applicable |
|                                                          |                                  | 17b | Not applicable |

### Methods: Data collection, management, and analysis

|                                                                                  |                         |     |                                                                                                                                                                                                                                                                                                                                                                                                                                      |
|----------------------------------------------------------------------------------|-------------------------|-----|--------------------------------------------------------------------------------------------------------------------------------------------------------------------------------------------------------------------------------------------------------------------------------------------------------------------------------------------------------------------------------------------------------------------------------------|
| 36<br>37<br>38<br>39<br>40<br>41<br>42                                           | Data collection methods | 18a | Data collection will be performed according to the figure as stated in section 13.                                                                                                                                                                                                                                                                                                                                                   |
|                                                                                  |                         | 18b | The follow up data will also be recorded in the eCRF by the investigators of the study.                                                                                                                                                                                                                                                                                                                                              |
| 43<br>44<br>45<br>46                                                             | Data management         | 19  | The original results will also be recorded in the eCRF by the investigators of the study. The data entry will be supervised by the Clinical Research Monitor.                                                                                                                                                                                                                                                                        |
| 47<br>48<br>49<br>50<br>51<br>52<br>53<br>54<br>55<br>56<br>57<br>58<br>59<br>60 | Statistical methods     | 20a | An exact single-stage phase II design will be used with a one-sided significance level $\alpha$ of 0.05 and a power of 80%. The maximum response rate that would be of no interest was assumed to be 5% and the minimum required response rate 30%. A total of 14 patients will be included in the study. If 3 or more out of these 14 patients have a response as defined in the study endpoints, the study is considered positive. |
|                                                                                  |                         | 20b | Not applicable                                                                                                                                                                                                                                                                                                                                                                                                                       |
|                                                                                  |                         | 20c | Not applicable                                                                                                                                                                                                                                                                                                                                                                                                                       |

## Methods: Monitoring

- 1  
2  
3  
4  
5  
6  
7  
8  
9  
10  
11  
12  
13  
14  
15  
16  
17  
18  
19  
20  
21  
22  
23  
24  
25  
26  
27  
28  
29  
30  
31  
32  
33  
34  
35  
36  
37  
38  
39  
40  
41
- |                 |     |                                                                                                                                                                                                                                                                                                                                                                                                                                                                                                                                                                                                                                                                                                                                                                                                                                                             |
|-----------------|-----|-------------------------------------------------------------------------------------------------------------------------------------------------------------------------------------------------------------------------------------------------------------------------------------------------------------------------------------------------------------------------------------------------------------------------------------------------------------------------------------------------------------------------------------------------------------------------------------------------------------------------------------------------------------------------------------------------------------------------------------------------------------------------------------------------------------------------------------------------------------|
| Data monitoring | 21a | Monitoring of the study will be performed according to ICH GCP by the Clinical Research Monitor of the NKI or the person to whom the monitoring tasks have been delegated. Amongst others the following will be reviewed: compliance with the protocol, ICH GCP and all applicable regulatory requirements; consent procedures, including date of consent and signatures; study progress; (Serious) Adverse Events; completion of the (e)CRFs and verification of data against the source data; and storage, dispensing and accountability of study medication.<br>The Medical Ethical Committee of the NKI will review the study every year throughout the complete study duration. During this review, the committee will focus on monitoring of the safety of patients and evaluate the balance between the efficacy and the harmfulness of propranolol. |
|                 | 21b | An interim analysis is planned after the treatment of seven patients. If there are already three or more responses at this time point, the study will be stopped and stated positive. Otherwise an additional seven patients will be included. Results of the study will be shared and be submitted for publication in an international peer-reviewed journal.                                                                                                                                                                                                                                                                                                                                                                                                                                                                                              |
| Harms           | 22  | All adverse events will be recorded in the electronic case report forms (eCRF) during the weekly outpatient clinic visits. We will perform extra blood draws, ECGs and measurements of the vital signs during these visits for safety assessments. The recording of the adverse events will be done according to the National Cancer Institute Common Toxicity Criteria for Adverse Events (CTCAE) version 5.0.                                                                                                                                                                                                                                                                                                                                                                                                                                             |
| Auditing        | 23  | Frequency and procedures for auditing trial conduct will be done yearly by the MEC of the NKI and will be independent from investigators and the sponsor.                                                                                                                                                                                                                                                                                                                                                                                                                                                                                                                                                                                                                                                                                                   |

## Ethics and dissemination

- 42  
43  
44  
45  
46  
47  
48  
49  
50  
51  
52  
53  
54  
55  
56  
57  
58  
59  
60
- |                          |    |                                                                                                                                                                                                                                                                                                                                          |
|--------------------------|----|------------------------------------------------------------------------------------------------------------------------------------------------------------------------------------------------------------------------------------------------------------------------------------------------------------------------------------------|
| Research ethics approval | 24 | Ethical approval was obtained from the Medical Ethical Committee of the Netherlands Cancer Institute.                                                                                                                                                                                                                                    |
| Protocol amendments      | 25 | Independent of the outcome, results of this study will be shared and submitted for publication in an international peer-reviewed journal. All essential documents (including patient files, the Investigator Study File, CRF's, amendements and electronic study data), data management and statistical files will be kept for 15 years. |

|    |                   |     |                                                                                                            |
|----|-------------------|-----|------------------------------------------------------------------------------------------------------------|
| 1  |                   |     |                                                                                                            |
| 2  | Consent or assent | 26a | Treating physicians will identify patients as possible candidates and                                      |
| 3  |                   |     | inform patients about the study. If patients agree to participate and                                      |
| 4  |                   |     | fulfil the selection criteria, patients will be included during an                                         |
| 5  |                   |     | outpatient clinic visit.                                                                                   |
| 6  |                   |     |                                                                                                            |
| 7  |                   | 26b | Not applicable                                                                                             |
| 8  |                   |     |                                                                                                            |
| 9  | Confidentiality   | 27  | The original results will also be recorded in the eCRF by the                                              |
| 10 |                   |     | investigators of the study. The data entry will be supervised by the                                       |
| 11 |                   |     | Clinical Research Monitor. The Medical Ethical Committee of the NKI                                        |
| 12 |                   |     | will review the study every year throughout the complete study                                             |
| 13 |                   |     | duration. During this review, the committee will focus on monitoring of                                    |
| 14 |                   |     | the safety of patients and evaluate the balance between the efficacy                                       |
| 15 |                   |     | and the harmfulness of propranolol.                                                                        |
| 16 |                   |     |                                                                                                            |
| 17 |                   |     |                                                                                                            |
| 18 | Declaration of    | 28  | No conflicts of interests to disclose related to this study                                                |
| 19 | interests         |     |                                                                                                            |
| 20 |                   |     |                                                                                                            |
| 21 |                   |     |                                                                                                            |
| 22 | Access to data    | 29  | Study investigators will have access to the final data. Results of the                                     |
| 23 |                   |     | study will be shared and be submitted for publication in an                                                |
| 24 |                   |     | international peer-reviewed journal.                                                                       |
| 25 |                   |     |                                                                                                            |
| 26 | Ancillary and     | 30  | The investigator has a liability insurance which is in accordance with                                     |
| 27 | post-trial care   |     | article 7 of the WMO.                                                                                      |
| 28 |                   |     | The AVL as sponsor of this study also has an insurance which is in                                         |
| 29 |                   |     | accordance with the legal requirements in the Netherlands (Article 7                                       |
| 30 |                   |     | WMO). This insurance provides cover for damage to research                                                 |
| 31 |                   |     | subjects through injury or death caused by the study. The insurance                                        |
| 32 |                   |     | applies to the damage that becomes apparent during the study or                                            |
| 33 |                   |     | within 4 years after the end of the study.                                                                 |
| 34 |                   |     |                                                                                                            |
| 35 |                   |     |                                                                                                            |
| 36 |                   |     |                                                                                                            |
| 37 | Dissemination     | 31a | Results of the study will be shared and be submitted for publication in                                    |
| 38 | policy            |     | an international peer-reviewed journal.                                                                    |
| 39 |                   |     |                                                                                                            |
| 40 |                   | 31b | Colleagues meeting the ICMJE criteria for authorship will become co-                                       |
| 41 |                   |     | author. No professional writers will be involved.                                                          |
| 42 |                   |     |                                                                                                            |
| 43 |                   | 31c | The study was registered through the Netherlands Trial Register (Trial                                     |
| 44 |                   |     | no. NL8118). <a href="https://www.trialregister.nl/trial/8118">https://www.trialregister.nl/trial/8118</a> |
| 45 |                   |     |                                                                                                            |
| 46 |                   |     |                                                                                                            |
| 47 | <b>Appendices</b> |     |                                                                                                            |
| 48 |                   |     |                                                                                                            |
| 49 | Informed consent  | 32  | Patient information folder in Dutch is attached                                                            |
| 50 | materials         |     |                                                                                                            |
| 51 |                   |     |                                                                                                            |
| 52 | Biological        | 33  | All data regarding the clinical records and biological specimens will be                                   |
| 53 | specimens         |     | stored anonymously for future research, if the patient gives consent in                                    |
| 54 |                   |     | the patient information folder.                                                                            |
| 55 |                   |     |                                                                                                            |

\*It is strongly recommended that this checklist be read in conjunction with the SPIRIT 2013 Explanation & Elaboration for important clarification on the items. Amendments to the protocol should be tracked and dated. The SPIRIT checklist is copyrighted by the SPIRIT

1  
2  
3  
4  
5  
6  
7  
8  
9  
10  
11  
12  
13  
14  
15  
16  
17  
18  
19  
20  
21  
22  
23  
24  
25  
26  
27  
28  
29  
30  
31  
32  
33  
34  
35  
36  
37  
38  
39  
40  
41  
42  
43  
44  
45  
46  
47  
48  
49  
50  
51  
52  
53  
54  
55  
56  
57  
58  
59  
60

Group under the Creative Commons "[Attribution-NonCommercial-NoDerivs 3.0 Unported](#)" license.

For peer review only



# BMJ Open

**PropAngio study protocol: a neoadjuvant trial on the efficacy of propranolol monotherapy in cutaneous angiosarcoma**  
**A proof of principle study**

|                                 |                                                                                                                                                                                                                                                                                                                                                                                                                                                                                                                                                                                                                                                                                                                                                                                                                                                                                                                                                                                                          |
|---------------------------------|----------------------------------------------------------------------------------------------------------------------------------------------------------------------------------------------------------------------------------------------------------------------------------------------------------------------------------------------------------------------------------------------------------------------------------------------------------------------------------------------------------------------------------------------------------------------------------------------------------------------------------------------------------------------------------------------------------------------------------------------------------------------------------------------------------------------------------------------------------------------------------------------------------------------------------------------------------------------------------------------------------|
| Journal:                        | <i>BMJ Open</i>                                                                                                                                                                                                                                                                                                                                                                                                                                                                                                                                                                                                                                                                                                                                                                                                                                                                                                                                                                                          |
| Manuscript ID                   | bmjopen-2020-039449.R2                                                                                                                                                                                                                                                                                                                                                                                                                                                                                                                                                                                                                                                                                                                                                                                                                                                                                                                                                                                   |
| Article Type:                   | Protocol                                                                                                                                                                                                                                                                                                                                                                                                                                                                                                                                                                                                                                                                                                                                                                                                                                                                                                                                                                                                 |
| Date Submitted by the Author:   | 03-Aug-2020                                                                                                                                                                                                                                                                                                                                                                                                                                                                                                                                                                                                                                                                                                                                                                                                                                                                                                                                                                                              |
| Complete List of Authors:       | Heinhuis, Kimberley; Netherlands Cancer Institute, Medical Oncology and Pharmacy & Pharmacology<br>IJzerman, Nikki; Netherlands Cancer Institute, Medical oncology and Pharmacy & Pharmacology; Erasmus MC Cancer Centre, Medical Oncology<br>Koenen, Anne Miek; Netherlands Cancer Institute, Medical Oncology and Pharmacy & Pharmacology<br>van der Graaf, Winette; Radboudumc, Medical Oncology; Netherlands Cancer Institute, Medical oncology<br>Haas, Rick; Netherlands Cancer Institute, Radiotherapy<br>Beijnen, Jos; Netherlands Cancer Institute, Pharmacy & Pharmacology; Utrecht University, Pharmaceutical sciences<br>Huitema, Alwin; Netherlands Cancer Institute - Antoni van Leeuwenhoek Hospital, Department of Pharmacy & Pharmacology; University Medical Center Utrecht, Utrecht University, Department of Clinical Pharmacy van Houdt, Winan; Netherlands Cancer Institute, Surgical Oncology<br>Steeghs, Neeltje; Netherlands Cancer Institute - Antoni van Leeuwenhoek Hospital |
| <b>Primary Subject Heading</b>: | Oncology                                                                                                                                                                                                                                                                                                                                                                                                                                                                                                                                                                                                                                                                                                                                                                                                                                                                                                                                                                                                 |
| Secondary Subject Heading:      | Evidence based practice                                                                                                                                                                                                                                                                                                                                                                                                                                                                                                                                                                                                                                                                                                                                                                                                                                                                                                                                                                                  |
| Keywords:                       | ONCOLOGY, Adult oncology < ONCOLOGY, Sarcoma < ONCOLOGY, VASCULAR MEDICINE                                                                                                                                                                                                                                                                                                                                                                                                                                                                                                                                                                                                                                                                                                                                                                                                                                                                                                                               |
|                                 |                                                                                                                                                                                                                                                                                                                                                                                                                                                                                                                                                                                                                                                                                                                                                                                                                                                                                                                                                                                                          |

SCHOLARONE™  
Manuscripts



I, the Submitting Author has the right to grant and does grant on behalf of all authors of the Work (as defined in the below author licence), an exclusive licence and/or a non-exclusive licence for contributions from authors who are: i) UK Crown employees; ii) where BMJ has agreed a CC-BY licence shall apply, and/or iii) in accordance with the terms applicable for US Federal Government officers or employees acting as part of their official duties; on a worldwide, perpetual, irrevocable, royalty-free basis to BMJ Publishing Group Ltd ("BMJ") its licensees and where the relevant Journal is co-owned by BMJ to the co-owners of the Journal, to publish the Work in this journal and any other BMJ products and to exploit all rights, as set out in our [licence](#).

The Submitting Author accepts and understands that any supply made under these terms is made by BMJ to the Submitting Author unless you are acting as an employee on behalf of your employer or a postgraduate student of an affiliated institution which is paying any applicable article publishing charge ("APC") for Open Access articles. Where the Submitting Author wishes to make the Work available on an Open Access basis (and intends to pay the relevant APC), the terms of reuse of such Open Access shall be governed by a Creative Commons licence – details of these licences and which [Creative Commons](#) licence will apply to this Work are set out in our licence referred to above.

Other than as permitted in any relevant BMJ Author's Self Archiving Policies, I confirm this Work has not been accepted for publication elsewhere, is not being considered for publication elsewhere and does not duplicate material already published. I confirm all authors consent to publication of this Work and authorise the granting of this licence.

# PropAngio study protocol: a neoadjuvant trial on the efficacy of propranolol monotherapy in cutaneous angiosarcoma

*A proof of principle study*

Kimberley M Heinhuis<sup>1,5\*</sup>, Nikki S IJzerman<sup>1,2,5\*</sup>, Anne Miek Koenen<sup>3</sup>, Winette TA van der Graaf<sup>1</sup>, Rick L Haas<sup>4</sup>, Jos H Beijnen<sup>5,6</sup>, Alwin DR Huitema<sup>5,7</sup>, Winan J van Houdt<sup>3</sup>, Neeltje Steeghs<sup>1</sup>.

\*These authors contributed equally.

## Affiliations

1. Department of Medical Oncology, Netherlands Cancer Institute, Amsterdam, the Netherlands
2. Department of Medical Oncology, Erasmus MC Cancer Institute, Erasmus University Medical Center, Rotterdam, the Netherlands
3. Department of Surgical Oncology, Netherlands Cancer Institute, Amsterdam, the Netherlands
4. Department of Radiotherapy, the Netherlands Cancer Institute, Amsterdam, the Netherlands
5. Department of Pharmacy & Pharmacology, Netherlands Cancer Institute, Amsterdam, the Netherlands.
6. Department of Pharmaceutical Sciences, Utrecht University, Utrecht, the Netherlands
7. Department of Clinical Pharmacy, University Medical Center Utrecht, Utrecht University, Utrecht, the Netherlands

**Corresponding author:** Nikki S IJzerman; postal address; Plesmanlaan 121, 1066 CX Amsterdam, the Netherlands, phone number +31205126255; mail: N.IJzerman@nki.nl.

**Word count:** Abstract: 306, Manuscript: 2350.

**Keywords:** oncology; adult oncology; sarcoma; vascular medicine

## ABSTRACT

**Introduction:** Angiosarcoma is a rare and aggressive malignancy with a high metastatic potential and recurrence rate. Despite optimal treatment with surgery, with or without radiation, the prognosis remains poor and, therefore, new treatment strategies are warranted. Recently, propranolol has effectively been repurposed for the treatment of infantile hemangioma. Propranolol is a  $\beta$ 3-sparing antagonist of the  $\beta$ -adrenergic receptor. In infantile hemangioma, the  $\beta$ 1,  $\beta$ 2 and  $\beta$ 3-receptors are highly expressed. Angiosarcoma has several similarities with hemangioma, including its high  $\beta$ -adrenergic receptor expression and the supposedly important role of VEGF in malignant growth. As a result, propranolol has been administered small-scale in individual angiosarcoma cases with promising results. The precise effect of propranolol, however, is not yet established.

**Methods and analysis:** The goal of this neoadjuvant window of opportunity study is to prospectively evaluate the activity of propranolol monotherapy in patients with cutaneous angiosarcoma. The neoadjuvant setting provides a good opportunity to rapidly evaluate both the clinical response and histological response, without a significant delay in standard anti-cancer treatment. Fourteen patients with primary, recurrent or metastatic cutaneous angiosarcoma will be included. Propranolol will be administered orally in an escalating dose during three to six weeks, before the initiation of standard treatment. The primary endpoint is clinical response according to RECIST, as measured on consecutive coloured photographs or CT/MRI. The histological response will be determined as secondary endpoint, comparing the difference in proliferation index before and after propranolol by measuring the change in immunohistochemistry staining of Ki-67. The study will be considered positive when at least 3 patients have a response to propranolol.

**Ethics and dissemination:** Ethical approval was obtained from the Medical Ethical Committee of the Netherlands Cancer Institute. Independent of the outcome, results of this study will be shared and submitted for publication in an international peer-reviewed journal.

**Trial registration number:** Registry through the Netherlands Trial Register (Trial no. NL8118).

## Strengths and limitations of this study

- The neoadjuvant setting provides the opportunity to evaluate the antitumor response of propranolol monotherapy without delaying the standard treatment.
- The propranolol dose will be escalated to optimize the safety profile of the treatment.
- As it is a window of opportunity study, the study duration will be relatively short.
- A limitation of the current design (proof of principle study), is the absence of randomisation.

For peer review only

## INTRODUCTION

Angiosarcoma is a rare and aggressive malignancy with a high metastatic potential. The estimated incidence of angiosarcoma is 0.4 per million patients per year, making it a very rare disease.[1] The standard of care for localised angiosarcoma is currently complete surgical resection with or without radiation. Unfortunately, despite the current standard of care, only 60% of patients with localized disease survive for more than five years.[2] Physicians and researchers are, therefore, in urgent need to find better treatment options for these patients.

Various additional drugs for systemic treatment have been investigated before.[2–4] Although the role of (neo)adjuvant chemotherapy remains controversial for localised disease, neoadjuvant chemotherapy is often administered for locally advanced angiosarcoma.[3,5–8] Several cytotoxic drugs, including anthracyclines, taxanes and gemcitabine, have shown activity in angiosarcoma in the locally advanced and metastatic setting, with overall response rates varying from 17 to 89%.[2–4] However, for the treatment of resectable angiosarcoma, none of the previous studies show a prolonged disease-free survival or overall survival.[3,5–10] Improved treatment in the neoadjuvant setting might reduce the local and distant recurrence rates by treating micrometastases at an early stage and by improving the resection margins, potentially leading to higher survival rates. As a result, new drugs are urgently needed to prolong the survival.

Propranolol hydrochloride, a synthetic  $\beta$ <sub>3</sub>-sparing-adrenergic receptor antagonist, was registered by the Food and Drug Agency (FDA) decades ago for the treatment of hypertension. Drug repurposing is a drug development strategy focused on the reuse of existing drugs for new medical indications. Recently, propranolol has been repurposed and is now used in the treatment of infantile hemangioma. Infantile hemangioma is a benign vascular tumour and propranolol dosed 3 mg/kg led to a complete to near complete resolution in approximately 88% of the treated infants with infantile hemangioma.[11,12] The pharmacological effects of propranolol in infantile hemangioma are presumed to cause vasoconstriction, a decreased expression of vascular growth endothelial growth factor (VEGF) and basic fibroblast growth factor (bFGF), inhibition of migration and proliferation of tumour cells and induction of apoptosis of endothelial cells.[12–16] Angiosarcoma have several similarities with infantile hemangioma, including its high  $\beta$ -adrenergic receptor expression and the suggested important role of VEGF in malignant growth.[14,17,18]

Several small case reports and case series have confirmed the idea that propranolol could be repurposed to treat angiosarcoma. In these case reports, patients with locally advanced or metastatic angiosarcoma were treated with propranolol, in combination with various chemotherapy regimens, including combination therapy with cyclophosphamide, etoposide, paclitaxel and vinblastine-based chemotherapy. The dose of propranolol in combination therapy varied between 80 to 120 mg per day.[19–24] In one case there was a response after 1 week of propranolol monotherapy 40 mg twice a day (BID).[22] These doses of propranolol are much lower than the standard maintenance dose of 160-320 mg daily for patients with hypertension.[25] Furthermore, there was a reduction in the proliferative index of 34%, stabilization of tumour growth and less necrosis.[22] Additionally, one case described a patient with metastatic cardiac angiosarcoma who showed a long term response (>12 months) to propranolol monotherapy, while the mean survival time is only four months.[26]

Since literature regarding the activity and mode of action of propranolol as a single agent for angiosarcoma is scarce, our aim is to evaluate the activity of propranolol monotherapy in patients with primary, recurrent or metastatic cutaneous angiosarcoma before they proceed to their standard anti-cancer treatment. The neoadjuvant setting provides a good opportunity to rapidly evaluate both the clinical and histological response, without delaying the standard anti-cancer treatment. Additional advantages of propranolol therapy would be the ease of use and the relatively mild toxicity profile. If this study turns out to be positive, further (randomized) clinical trials are thereby substantiated and highly recommended.

## **METHODS AND ANALYSIS**

### **Aim and objectives**

The aim of this study is to investigate the effect of neoadjuvant propranolol monotherapy in patients with primary, recurrent or metastatic cutaneous angiosarcoma, before they proceed to their standard anti-cancer treatment (e.g. isolated limb perfusion, chemotherapy, targeted therapy, surgical resection or radiotherapy). The primary objective is to determine the clinical response of propranolol monotherapy and the histologic response will be evaluated as secondary objective.

### **Study design and study treatment**

This is a prospective proof of principle study with neoadjuvant propranolol monotherapy in cutaneous angiosarcoma patients. We will use the neoadjuvant window as an opportunity to explore the activity of propranolol monotherapy, without delaying the standard treatment. The duration of treatment will be three to six weeks. In this single arm trial, angiosarcoma patients will be treated with propranolol monotherapy in an inpatient escalating dose, which will be adjusted to the tolerability of propranolol. The treatment plan of propranolol is provided in *Table 1*. The treatment plan was designed based on doses used in previous literature [15,21,24,26] and not exceeding the maximum maintenance dose of 320 mg/day for the registered indication hypertension (maximum daily dose in our study 240 mg/day).[25] In case of hypotension (blood pressure <90/60 mmHg) or bradycardia (heart rate <55 bpm), or symptoms of bradycardia or hypotension (dizziness, syncope) the dose will be reduced to the previous dose level. In case of serious bradycardia (heart rate <50 bpm), the treatment will be stopped until an acceptable heart rate (>55 bpm) is reached and propranolol will be restarted in the dose of the previous level.

*Table 1. Propranolol treatment plan.*

| <b>Dose escalation scheme</b>                   |                   |              |
|-------------------------------------------------|-------------------|--------------|
| <b>Period</b>                                   | <b>Dose level</b> | <b>Dose</b>  |
| Day 1 – Day 7                                   | 1*                | 2x/day 40 mg |
| Day 8 – Day 14                                  | 2*                | 2x/day 80 mg |
| Day 15 – Day of surgery or biopsy               | 3*                | 3x/day 80 mg |
| <b>Tapering off scheme after surgery/biopsy</b> |                   |              |
| <b>Period</b>                                   | <b>Dose</b>       |              |
| Day 1 - Day 7                                   | 2x/day 80 mg      |              |
| Day 8 - Day 14                                  | 2x/day 40 mg      |              |

\*All patients start on day 1 with dose level 1.

The tolerability will be assessed during weekly visits in the outpatient clinic (*figure 1*). Each visit consists of a physical examination, blood draw for safety assessment (hematology, hepatic- and renal function), vital signs, electrocardiogram (ECG), toxicity assessment, concomitant medication registration and tumour response assessment. After the study treatment, a biopsy will be obtained to evaluate the histologic response to propranolol monotherapy. Propranolol will be tapered off after the biopsy, to prevent withdrawal symptoms (*table 1*).



1  
2  
3  
4  
5  
6  
7  
8  
9  
10  
11  
12  
13  
14  
15  
16  
17  
18  
19  
20  
21  
22  
23  
24  
25  
26  
27  
28  
29  
30  
31  
32  
33  
34  
35  
36  
37  
38  
39  
40  
41  
42  
43  
44  
45  
46  
47  
48  
49  
50  
51  
52  
53  
54  
55  
56  
57  
58  
59  
60

For peer review only

## Patient selection

The study population consists of patients with primary, recurrent or metastatic cutaneous angiosarcoma, including angiosarcoma of the breast (radiation induced). Only patients with cutaneous angiosarcoma can participate, since these tumours are easily measurable on coloured photographs for clinical response evaluation. Patients are eligible if they are at least 18 years old; have a good performance status (world health organization (WHO-PS) of 0-2); have an adequate blood count, kidney and renal function; have a window of at least three weeks between their diagnosis and the start of the standard anti-cancer treatment and have evaluable disease according to the Response Evaluation Criteria in Solid Tumours (RECIST) 1.1 criteria. Patients with primary visceral angiosarcoma, contraindications for  $\beta$ -blockade therapy or current treatment with  $\beta$ -blockade therapy (both selective and non-selective  $\beta$ -blockade therapy) or other anti-cancer treatment are excluded.

## Sample size calculation

An exact single-stage phase II design will be used with a one-sided significance level  $\alpha$  of 0.05 and a power of 80%. The maximum response rate that would be of no interest was assumed to be 5% and the minimum required response rate 30%. A total of 14 patients will be included in the study. If 3 or more out of these 14 patients have a response as defined in the study endpoints, the study is considered positive.

## Study endpoints

### *Primary endpoint*

The clinical response will be determined according to RECIST 1.1 criteria (PD is  $>20\%$  increase in size, PR is  $>30\%$  decrease in size, SD is in between while CR is no measurable disease).[27] A response is defined as CR, PR, or SD with an improvement in clinical characteristics, like thickness, erythema, necrosis or edema of the inflicted area. Documentation will be performed with colour photography, including a ruler to measure the size of the lesion. Radiologic assessment will only be done if the patient has radiologic evaluable disease at the beginning of the study treatment. If the study turns out to be positive, this treatment modality is highly interesting and should be tested further in a randomized trial.

### *Secondary endpoint*

The histologic response on propranolol treatment is defined as difference in proliferation index. This will be assessed by measuring the change in immunohistochemistry staining of Ki-67 and the tumour activity between the post-treatment biopsy (obtained during surgery if applicable) and the diagnostic biopsy before the study treatment. A decrease of >30% of the Ki-67 staining will be considered as a positive histologic response.

### *Exploratory endpoints*

To obtain additional data regarding the primary objectives, the percentage of adrenergic receptors ( $\beta$ 1-AR,  $\beta$ 2-AR,  $\beta$ 3-AR) in the pre-treatment biopsies will be measured with immunohistochemically staining and the correlation with the anti-tumour response of the angiosarcoma patients will be investigated.[13,22] With this correlation analysis, the predictive value of adrenergic receptor expression in tumour tissue on the anti-tumour response will be assessed. Finally, we will compare the PET response before start of treatment and at the end of propranolol treatment.

### **Study logistics**

#### *Patient recruitment and study duration*

Treating physicians will identify patients as possible candidates and inform patients about the study. If patients agree to participate and fulfil the selection criteria, patients will be included during an outpatient clinic visit. As this is a monocenter study, all patients will be included in the Netherlands Cancer Institute (NKI). Approximately 20 new angiosarcoma patients are seen in the NKI yearly. As a result, the expected duration of the study is two years. Enrolment started on 27 December 2019.

#### *Safety assessments*

All adverse events will be recorded in the electronic case report forms (eCRF) during the weekly outpatient clinic visits. We will perform extra blood draws, ECGs and measurements of the vital signs during these visits for safety assessments. The recording of the adverse events will be done

1  
2  
3 according to the National Cancer Institute Common Toxicity Criteria for Adverse Events  
4 (CTCAE) version 5.0.  
5  
6  
7

### 8 *Data management*

9  
10 The original results will also be recorded in the eCRF by the investigators of the study. The data  
11 entry will be supervised by the Clinical Research Monitor.  
12  
13  
14

### 15 *Study monitoring*

16  
17 Monitoring of the study will be performed according to ICH GCP by the Clinical Research Monitor  
18 of the NKI or the person to whom the monitoring tasks have been delegated. Amongst others the  
19 following will be reviewed: compliance with the protocol, ICH GCP and all applicable regulatory  
20 requirements; consent procedures, including date of consent and signatures; study progress;  
21 (Serious) Adverse Events; completion of the (e)CRFs and verification of data against the source  
22 data; and storage, dispensing and accountability of study medication.  
23  
24  
25  
26

27 The Medical Ethical Committee of the NKI will review the study every year throughout the  
28 complete study duration. During this review, the committee will focus on monitoring of the safety of  
29 patients and evaluate the balance between the efficacy and the harmfulness of propranolol.  
30  
31  
32  
33

### 34 *Termination of the study*

35  
36 An interim analysis is planned after the treatment of seven patients. If there are already three or  
37 more responses at this time point, the study will be stopped and stated positive. Otherwise an  
38 additional seven patients will be included. Results of the study will be shared and be submitted for  
39 publication in an international peer-reviewed journal.  
40  
41  
42  
43

### 44 *Patient and public involvement statement*

45  
46 The trial protocol and other trial documents were developed in collaboration with the Dutch  
47 sarcoma patient advocacy group. They evaluated the specific patient need for this trial. They fully  
48 support this trial and the concept of exploring drug-repurposing strategies to improve outcome in  
49 sarcoma. The patient advocacy group will be informed about the progress of the study and the  
50 study time lines.  
51  
52  
53  
54  
55  
56  
57  
58  
59  
60

1  
2  
3 The study is funded by a Belgian non-profit organisation: the Anticancer Fund. Their mission is  
4 to complement current cancer care with patient-first thinking and a focus on evidence-based  
5 potential for new treatments. Financially, the Anticancer Fund is completely dependent on  
6 donations and private funding. The Anticancer Fund supports diverse clinical trials, mainly in  
7 under-prioritised treatment groups (such as in rare tumours), with non-conventional therapies and  
8 repurposed drugs. The trial was registered in the Netherlands Trial Register (NL71090.031.19).  
9  
10  
11  
12  
13  
14

### 15 **Ethics and dissemination**

16 Ethical approval was obtained from the Medical Ethical Committee of the Netherlands Cancer  
17 Institute. Independent of the outcome, results of this study will be shared and submitted for  
18 publication in an international peer-reviewed journal.  
19  
20  
21

22 All essential documents (including patient files, the Investigator Study File, CRF's and electronic  
23 study data), data management and statistical files will be kept for 15 years.  
24  
25  
26

### 27 **Summary**

28 Angiosarcoma is an extremely rare and aggressive malignancy with a high metastatic potential and  
29 a dismal prognosis. The current standard treatment cannot sufficiently manage the disease.  
30 Therefore, new strategies are warranted. Drug repurposing is a process of developing approved  
31 drugs for new medical indications. A strong rationale for repurposing of propranolol for the  
32 treatment of angiosarcoma patients exists. The precise effect of propranolol monotherapy is not  
33 yet established. In this study, we will therefore address the question about the efficacy of  
34 propranolol as neoadjuvant monotherapy in patients with cutaneous angiosarcoma. If this study  
35 shows positive results, further clinical trials are needed to establish the role of propranolol in the  
36 treatment of angiosarcoma, possibly even in combination with other agents such as chemotherapy,  
37 targeted therapy or immunotherapy.  
38  
39  
40  
41  
42  
43  
44  
45  
46  
47

### 48 **Acknowledgments**

49 The authors would like to thank the Dutch sarcoma patient advocacy group (Patiëntenplatform  
50 Sarcomen) and the Anticancer Fund for their contributions to the study.  
51  
52  
53  
54  
55  
56  
57  
58  
59  
60

**Authors' contributions**

KH, NIJ, AMK, WG, RH, JB, AH, WH and NS each made substantial contributions to the conception or design of the study protocol. NIJ and KH wrote the first draft of the protocol and this paper. AMK, WG, RH, WH, JB, AH and NS provided critical input regarding the design of the study or study logistics. KH, NIJ, AMK, WG, RH, JB, AH, WH and NS revised the protocol critically and approved the final version to be published.

**Funding statement**

This work was supported by Anticancer Fund from Belgium, grant number 40117.

**Competing interest statements**

The authors declare that they have no conflicts of interest related to this study.

## REFERENCES

1. Rouhani P, Fletcher CD, Devesa SS TJ, et al. Cutaneous soft tissue sarcoma incidence patterns in the U.S. : an analysis of 12,114 cases. *Cancer* 2008;113(3):616–27.
2. Young RJ, Brown NJ, Reed MW, et al. Angiosarcoma. *Lancet Oncol* 2010;11(10):983–91.
3. Oxenberg J, Khushalani NI, Salerno KE, et al. Neoadjuvant chemotherapy for primary cutaneous/soft tissue angiosarcoma: Determining tumor behavior prior to surgical resection. *J Surg Oncol* 2015;111(7):829–33.
4. Stacchiotti S, Palassini E, Sanfilippo R, et al. Gemcitabine in advanced angiosarcoma: a retrospective case series analysis from the Italian Rare Cancer Network. *Ann Oncol* 2012;23(2):501–8.
5. DeMartelaere SL, Roberts D, Burgess MA, et al. Neoadjuvant chemotherapy–specific and overall treatment outcomes in patients with cutaneous angiosarcoma of the face with periorbital involvement. *Head Neck* 2008 May;30(5):639–46.
6. Fayette J, Martin E, Piperno-Neumann S, et al. Angiosarcomas, a heterogeneous group of sarcomas with specific behavior depending on primary site: a retrospective study of 161 cases. *Ann Oncol* 2007;18(12):2030–6.
7. Guadagnolo BA, Zagars GK, Araujo D, et al. Outcomes after definitive treatment for cutaneous angiosarcoma of the face and scalp. *Head Neck* 2011;33(5):661–7.
8. Sinnamon AJ, Neuwirth MG, McMillan MT, et al. A prognostic model for resectable soft tissue and cutaneous angiosarcoma. *J Surg Oncol* 2016;114(5):557–63.
9. Li H, Yang S, Chen H, et al. Survival after heart transplantation for non-metastatic primary cardiac sarcoma. *J Cardiothorac Surg* 2016;11(1):145.
10. Abu Saleh WK, Ramlawi B, Shapira OM, et al. Improved Outcomes With the Evolution of a Neoadjuvant Chemotherapy Approach to Right Heart Sarcoma. *Ann Thorac Surg* 2017 Jul;104(1):90–6.
11. Léauté-Labrèze C, Hoeger P, Mazereeuw-Hautier J, et al. A Randomized, Controlled Trial of Oral Propranolol in Infantile Hemangioma. *N Engl J Med* 2015 Feb 19;372(8):735–46.
12. Léauté-Labrèze C, de la Roque ED, Hubiche T, et al. A. Propranolol for Severe Hemangiomas of Infancy. *N Engl J Med* 2008;358(24):2649–51.
13. Chisholm KM, Chang KW, Truong MT, et al.  $\beta$ -Adrenergic receptor expression in vascular tumors. *Mod Pathol* 2012;25(11):1446–51.

14. Stiles JM, Amaya C, Rains S, et al. Targeting of beta adrenergic receptors results in therapeutic efficacy against models of hemangioendothelioma and angiosarcoma. *PLoS One* 2013;8(3):e60021.
15. Amaya CN, Perkins M, Belmont A, et al. Non-selective beta blockers inhibit angiosarcoma cell viability and increase progression free- and overall-survival in patients diagnosed with metastatic angiosarcoma. *Oncoscience* 2018;5(3–4):109–19.
16. Pasquier E, Ciccolini J, Carre M, et al. Propranolol potentiates the anti-angiogenic effects and anti-tumor efficacy of chemotherapy agents: implication in breast cancer treatment. *Oncotarget* 2011;2(10):797–809.
17. Greenberger S, Bischoff J. Pathogenesis of infantile haemangioma. *Br J Dermatol* 2013;169(1):12–19.
18. Itakura E, Yamamoto H, Oda Y, Tsuneyoshi M. Detection and characterization of vascular endothelial growth factors and their receptors in a series of angiosarcomas. *J Surg Oncol* 2008;97:74–81.
19. Daguzé J, Saint-Jean M, Peuvrel L, et al. Visceral metastatic angiosarcoma treated effectively with oral cyclophosphamide combined with propranolol. *JAAD Case Reports* 2016;2(6):497–9.
20. Pasquier E, André N, Street J, et al. Effective Management of Advanced Angiosarcoma by the Synergistic Combination of Propranolol and Vinblastine-based Metronomic Chemotherapy: A Bench to Bedside Study. *EBioMedicine* 2016;6:87–95.
21. Chow W, Amaya CN, Rains S, et al. Growth Attenuation of Cutaneous Angiosarcoma With Propranolol-Mediated  $\beta$ -Blockade. *JAMA dermatology* 2015;151(11):1226–9.
22. Pramanik R, Gogia A, Malik PS, et al. Metastatic Primary Angiosarcoma of the Breast: Can We Tame It the Metronomic Way. *Indian J Med Paediatr Oncol* 2017;38(2):228–31.
23. Banavali S, Pasquier E, Andre N. Targeted therapy with propranolol and metronomic chemotherapy combination: sustained complete response of a relapsing metastatic angiosarcoma. *Ecancermedicalscience* 2015;9:499.
24. Daguzé J, Saint-Jean M, Dréno B. Large nose angiosarcoma treated effectively with oral cyclophosphamide combined with propranolol. *J Eur Acad Dermatology Venereol* 2018;32(2):e52–4.
25. European Medicines Agency. Propranolol 40 mg film-coated tablets - Summary of Product



- 1  
2  
3 Characteristics (SmPC) - (eMC) [Internet]. Available from:  
4 <https://www.medicines.org.uk/emc/product/2904/smpc>  
5  
6  
7 26. Galván DC, Ayyappan AP, Bryan BA. Regression of primary cardiac angiosarcoma and  
8 metastatic nodules following propranolol as a single agent treatment. *Oncoscience*  
9 2018;5(9–10):262.  
10  
11 27. Schwartz LH, Seymour L, Litière S, et al. RECIST 1.1 - Standardisation and disease-  
12 specific adaptations: Perspectives from the RECIST Working Group. *Eur J Cancer*.  
13 2016;62(Jul):138–45.  
14  
15  
16  
17  
18  
19  
20

## 21 **Legends**

22 *Figure 1. Study assessments.* Figure 1 gives an overview of the study assessments, which are  
23 planned at baseline, during study treatment or when the standard treatment is initiated.  
24  
25  
26  
27  
28  
29  
30  
31  
32  
33  
34  
35  
36  
37  
38  
39  
40  
41  
42  
43  
44  
45  
46  
47  
48  
49  
50  
51  
52  
53  
54  
55  
56  
57  
58  
59  
60

1  
2  
3  
4  
5  
6  
7  
8  
9  
10  
11  
12  
13  
14  
15  
16  
17  
18  
19  
20  
21  
22  
23  
24  
25  
26  
27  
28  
29  
30  
31  
32  
33  
34  
35  
36  
37  
38  
39  
40  
41  
42  
43  
44  
45  
46  
47  
48  
49  
50  
51  
52  
53  
54  
55  
56  
57  
58  
59  
60

**Baseline**

- Informed consent
- Biopsy
- Physical exam
- Laboratory exams
- ECG
- Tumor measurement

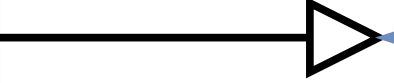

Start  
propranolol



**Study treatment  
3-6 weeks**

Weekly study assessments:

- Physical examination
- Laboratory exams
- ECG
- Tumor measurement

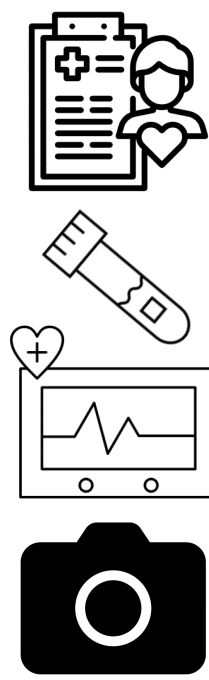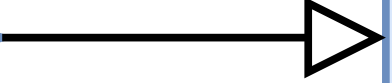

**Standard treatment**

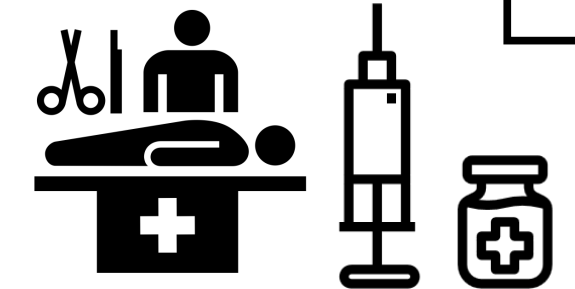

Tapering off propranolol



SPIRIT 2013 Checklist: Recommended items to address in a clinical trial protocol and related documents\*

| Section/item                      | Item No | Description                                                                                                                       |
|-----------------------------------|---------|-----------------------------------------------------------------------------------------------------------------------------------|
| <b>Administrative information</b> |         |                                                                                                                                   |
| Title                             | 1       | PropAngio: a neoadjuvant trial on the efficacy of propranolol monotherapy in cutaneous angiosarcoma<br>A proof of principle study |
| Trial registration                | 2a      | Registry through the Netherlands Trial Register (Trial no. NL8118).                                                               |
|                                   | 2b      | <a href="https://www.trialregister.nl/trial/8118">https://www.trialregister.nl/trial/8118</a>                                     |
| Protocol version                  | 3       | Version 2.0, 7 October 2019                                                                                                       |
| Funding                           | 4       | The study is funded by the Anticancer Fund from Belgium.                                                                          |

1  
2 Roles and  
3 responsibilities  
4  
5  
6  
7

5a Kimberley M. Heinhuis<sup>1,5\*</sup>, Nikki S. IJzerman<sup>1,2,5\*</sup>, Anne Miek Koenen<sup>3</sup>,  
Winette T.A. van der Graaf<sup>1</sup>, Rick L. Haas<sup>4</sup>, Jos H. Beijnen<sup>5,6</sup>, Alwin  
D.R. Huitema<sup>5,7</sup>, Winan J. van Houdt<sup>3</sup>, Neeltje Steeghs<sup>1</sup>.

\*These authors contributed equally.

8 Affiliations

9 1. Department of Medical Oncology, Netherlands Cancer  
10 Institute, Amsterdam, the Netherlands

11 2. Department of Medical Oncology, Erasmus MC Cancer  
12 Institute, Erasmus University Medical Center, Rotterdam, the  
13 Netherlands

14 3. Department of Surgical Oncology, Netherlands Cancer  
15 Institute, Amsterdam, the Netherlands

16 4. Department of Radiotherapy, the Netherlands Cancer Institute,  
17 Amsterdam, the Netherlands

18 5. Department of Pharmacy & Pharmacology, Netherlands  
19 Cancer Institute, Amsterdam, the Netherlands.

20 6. Department of Pharmaceutical Sciences, Utrecht University,  
21 Utrecht, the Netherlands

22 7. Department of Clinical Pharmacy, University Medical Center  
23 Utrecht, Utrecht University, Utrecht, the Netherlands

24 Authors' contributions

25 KH, NIJ, AMK, WG, RH, JB, AH, WH and NS each made substantial  
26 contributions to the conception or design of the study protocol. NIJ  
27 and KH wrote the first draft of the protocol and this paper. AMK, WG,  
28 RH, WH, JB, AH and NS provided critical input regarding the design  
29 of the study or study logistics. KH, NIJ, AMK, WG, RH, JB, AH, WH  
30 and NS revised the protocol critically and approved the final version to  
31 be published.

32 5b Anticancer Fund Belgium, Liese Vandeborne, Research Manager, +32  
33 2 268 48 16, [www.anticancerfund.org](http://www.anticancerfund.org), Boechoutlaan 221, 1853  
34 Strombeek-Bever, Belgium.

35 5c The study sponsor and funders will not have ultimate authority in  
36 study design; collection, management, analysis, and interpretation of  
37 data; writing of the report; and the decision to submit the report for  
38 publication.

39 5d Not applicable.  
40  
41  
42  
43  
44  
45  
46  
47  
48  
49  
50  
51  
52  
53  
54  
55  
56  
57  
58  
59  
60

## Introduction

### Background and rationale

6a Angiosarcoma is a rare and aggressive malignancy with a high metastatic potential.(1) The standard of care for localised angiosarcoma is currently complete surgical resection with or without radiation. Unfortunately, despite the current standard of care, only 60% of patients with localized disease survive for more than five years.(2)

Several cytotoxic drugs, including anthracyclines, taxanes and gemcitabine, have shown activity in angiosarcoma in the locally advanced and metastatic setting, with overall response rates varying from 17 to 89%.(2–4) However, for the treatment of resectable angiosarcoma, none of the previous studies show a prolonged disease-free survival or overall survival.(3,5–10) Improved treatment in the neoadjuvant setting might reduce the local and distant recurrence rates by treating micrometastases at an early stage and by improving the resection margins, potentially leading to higher survival rates. As a result, new drugs are urgently needed to prolong the survival.

Recently, propranolol has been repurposed and is now successfully used in the treatment of hemangioma.(11,12) Angiosarcoma have several similarities with hemangioma, including its high  $\beta$ -adrenergic receptor expression and the supposedly important role of VEGF in malignant growth.(11,17)

Several small case reports and case series have confirmed the idea that propranolol could be repurposed to treat angiosarcoma. The dose of propranolol in combination therapy varied between 80 to 120 mg per day.(18–23) These doses of propranolol are much lower than the standard maintenance dose of 160-320 mg daily for patients with hypertension.(24)

Since literature regarding the activity and mode of action of propranolol as a single agent for angiosarcoma is scarce, our aim is to evaluate the activity of propranolol monotherapy in patients with primary, recurrent or metastatic cutaneous angiosarcoma before they proceed to their standard anti-cancer treatment. The neoadjuvant setting provides a good opportunity to rapidly evaluate both the clinical and histological response, without delaying the standard anti-cancer treatment. Additional advantages of propranolol therapy would be the ease of use and the relatively mild toxicity profile. If this study turns out to be positive, further (randomized) clinical trials are thereby substantiated and highly recommended.

*[Reference numbers refer to references list in paper].*

6b This is a proof of principle study with no comparator because there is no current standard neoadjuvant treatment for angiosarcoma.

- 1  
2  
3  
4  
5  
6  
7  
8  
9  
10  
11  
12  
13  
14  
15  
16  
17  
18  
19
- Objectives 7 The aim of this study is to investigate the effect of neoadjuvant propranolol monotherapy in patients with primary, recurrent or metastatic cutaneous angiosarcoma, before they proceed to their standard anti-cancer treatment (e.g. isolated limb perfusion, chemotherapy, targeted therapy, surgical resection or radiotherapy). The primary objective is to determine the clinical response of propranolol monotherapy and the histologic response will be evaluated as secondary objective.
- Trial design 8 This is a single armed, phase II, proof of principle study.

20  
21  
22  
23  
24  
25  
26  
27  
28  
29  
30  
31  
32  
33  
34  
35  
36  
37  
38  
39  
40  
41  
42

### Methods: Participants, interventions, and outcomes

- Study setting 9 This is a monocenter study and all patients will be treated in the Netherlands Cancer institute in Amsterdam, Antoni van Leeuwenhoek hospital.
- Eligibility criteria 10 The study population consists of patients with primary, recurrent or metastatic cutaneous angiosarcoma, including angiosarcoma of the breast. Only patients with cutaneous angiosarcoma can participate, since these tumours are easily measurable on coloured photographs for clinical response evaluation. Patients are eligible if they are at least 18 years old; have a good performance status (world health organization (WHO-PS) of 0-2); have an adequate blood count, kidney and renal function; have a window of at least three weeks between their diagnosis and the start of the standard anti-cancer treatment and have evaluable disease according to the Response Evaluation Criteria in Solid Tumours (RECIST) 1.1 criteria. Patients with primary visceral angiosarcoma, contraindications for  $\beta$ -blockade therapy or current treatment with  $\beta$ -blockade therapy (both selective and non-selective  $\beta$ -blockade therapy) or other anti-cancer treatment are excluded.
- Interventions 11a All patients will follow the same scheme (single armed study):

| Dose escalation scheme                   |              |              |
|------------------------------------------|--------------|--------------|
| Period                                   | Dose level   | Dose         |
| Day 1 – Day 7                            | 1*           | 2x/day 40 mg |
| Day 8 – Day 14                           | 2*           | 2x/day 80 mg |
| Day 15 – Day of surgery or biopsy        | 3*           | 3x/day 80 mg |
| Tapering off scheme after surgery/biopsy |              |              |
| Period                                   | Dose         |              |
| Day 1 - Day 7                            | 2x/day 80 mg |              |
| Day 8 - Day 14                           | 2x/day 40 mg |              |

- 1  
2  
3  
4  
5  
6  
7  
8  
9  
10  
11  
12  
13  
14  
15  
16  
17  
18  
19  
20  
21  
22  
23  
24  
25  
26  
27  
28  
29  
30  
31  
32  
33  
34  
35  
36  
37  
38  
39  
40  
41  
42  
43  
44  
45  
46  
47  
48  
49  
50  
51  
52  
53  
54  
55  
56  
57  
58  
59  
60
- 11b In case of hypotension (blood pressure <90/60 mmHg) or bradycardia (heart rate <55 bpm), or symptoms of bradycardia or hypotension (dizziness, syncope) the dose will be reduced to the previous dose level. In case of serious bradycardia (heart rate <50 bpm), the treatment will be stopped until an acceptable heart rate (>55 bpm) is reached and propranolol will be restarted in the dose of the previous level. A patient can stop study treatment by withdrawing the informed consent at any time.
- 11c The tolerability will be assessed during weekly visits in the outpatient clinic. Each visit consists of a physical examination, blood draw for safety assessment (hematology, hepatic- and renal function), vital signs, electrocardiogram (ECG), toxicity assessment, concomitant medication registration and tumour response assessment. After the study treatment, a biopsy will be obtained to evaluate the histologic response to propranolol monotherapy. Monitoring of the study will be performed according to ICH GCP by the Clinical Research Monitor of the NKI or the person to whom the monitoring tasks have been delegated
- 11d Treatment with other beta blockade therapy or anticancer therapies are prohibited (except hormonal therapy for breast cancer).

## Outcomes

## 12 Primary endpoint

The clinical response will be determined according to RECIST 1.1 criteria (PD is >20% increase in size, PR is >30% decrease in size, SD is in between while CR is no measurable disease).(26) A response is defined as CR, PR, or SD with an improvement in clinical characteristics, like thickness, erythema, necrosis or edema of the inflicted area. Documentation will be performed with colour photography, including a ruler to measure the size of the lesion. Radiologic assessment will only be done if the patient has radiologic evaluable disease at the beginning of the study treatment. If the study turns out to be positive, this treatment modality is highly interesting and should be tested further in a randomized trial.

## Secondary endpoint

The histologic response on propranolol treatment is defined as difference in proliferation index. This will be assessed by measuring the change in immunohistochemistry staining of Ki-67 and the tumour activity between the post-treatment biopsy (obtained during surgery if applicable) and the diagnostic biopsy before the study treatment. A decrease of >30% of the Ki-67 staining will be considered as a positive histologic response.

## Exploratory endpoints

To obtain additional data regarding the primary objectives, the percentage of adrenergic receptors (ADRB1, ADRB2, and ADRB3) in the pre-treatment biopsies will be measured with immunohistochemically staining and the correlation with the anti-tumour response of the angiosarcoma patients will be investigated.(13,20) With this correlation analysis, the predictive value of adrenergic receptor expression in tumour tissue on the anti-tumour response will be assessed. Furthermore, we plan to assess the drug sensitivity with and without different chemotherapy regimens in vitro. Finally, we will compare the PET response before start of treatment and at the end of propranolol treatment.

## Participant timeline

## 13

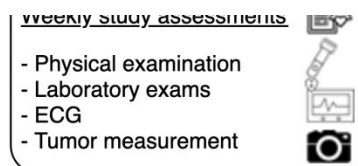



|                                                 |             |    |                                                                                                                                                                                                                                                                                                                                                                                                                                      |
|-------------------------------------------------|-------------|----|--------------------------------------------------------------------------------------------------------------------------------------------------------------------------------------------------------------------------------------------------------------------------------------------------------------------------------------------------------------------------------------------------------------------------------------|
| 1<br>2<br>3<br>4<br>5<br>6<br>7<br>8<br>9<br>10 | Sample size | 14 | An exact single-stage phase II design will be used with a one-sided significance level $\alpha$ of 0.05 and a power of 80%. The maximum response rate that would be of no interest was assumed to be 5% and the minimum required response rate 30%. A total of 14 patients will be included in the study. If 3 or more out of these 14 patients have a response as defined in the study endpoints, the study is considered positive. |
| 11<br>12<br>13<br>14<br>15                      | Recruitment | 15 | The sarcoma unit of the NKI was trained for the study. Patientenplatform sarcomen, DSSG and Anticancer Fund Belgium are also informed and will provide information to possible patients.                                                                                                                                                                                                                                             |

### Methods: Assignment of interventions (for controlled trials)

#### Allocation:

|                                                          |                                  |     |                |
|----------------------------------------------------------|----------------------------------|-----|----------------|
| 19<br>20<br>21<br>22<br>23<br>24<br>25<br>26<br>27<br>28 | Sequence generation              | 16a | Not applicable |
| 23<br>24<br>25<br>26                                     | Allocation concealment mechanism | 16b | Not applicable |
| 27<br>28                                                 | Implementation                   | 16c | Not applicable |
| 29<br>30<br>31<br>32<br>33                               | Blinding (masking)               | 17a | Not applicable |
|                                                          |                                  | 17b | Not applicable |

### Methods: Data collection, management, and analysis

|                                                                                  |                         |     |                                                                                                                                                                                                                                                                                                                                                                                                                                      |
|----------------------------------------------------------------------------------|-------------------------|-----|--------------------------------------------------------------------------------------------------------------------------------------------------------------------------------------------------------------------------------------------------------------------------------------------------------------------------------------------------------------------------------------------------------------------------------------|
| 36<br>37<br>38<br>39<br>40<br>41<br>42                                           | Data collection methods | 18a | Data collection will be performed according to the figure as stated in section 13.                                                                                                                                                                                                                                                                                                                                                   |
|                                                                                  |                         | 18b | The follow up data will also be recorded in the eCRF by the investigators of the study.                                                                                                                                                                                                                                                                                                                                              |
| 43<br>44<br>45<br>46                                                             | Data management         | 19  | The original results will also be recorded in the eCRF by the investigators of the study. The data entry will be supervised by the Clinical Research Monitor.                                                                                                                                                                                                                                                                        |
| 47<br>48<br>49<br>50<br>51<br>52<br>53<br>54<br>55<br>56<br>57<br>58<br>59<br>60 | Statistical methods     | 20a | An exact single-stage phase II design will be used with a one-sided significance level $\alpha$ of 0.05 and a power of 80%. The maximum response rate that would be of no interest was assumed to be 5% and the minimum required response rate 30%. A total of 14 patients will be included in the study. If 3 or more out of these 14 patients have a response as defined in the study endpoints, the study is considered positive. |
|                                                                                  |                         | 20b | Not applicable                                                                                                                                                                                                                                                                                                                                                                                                                       |
|                                                                                  |                         | 20c | Not applicable                                                                                                                                                                                                                                                                                                                                                                                                                       |

## Methods: Monitoring

- 1  
2  
3  
4  
5  
6  
7  
8  
9  
10  
11  
12  
13  
14  
15  
16  
17  
18  
19  
20  
21  
22  
23  
24  
25  
26  
27  
28  
29  
30  
31  
32  
33  
34  
35  
36  
37  
38  
39  
40  
41
- |                 |     |                                                                                                                                                                                                                                                                                                                                                                                                                                                                                                                                                                                                                                                                                                                                                                                                                                                             |
|-----------------|-----|-------------------------------------------------------------------------------------------------------------------------------------------------------------------------------------------------------------------------------------------------------------------------------------------------------------------------------------------------------------------------------------------------------------------------------------------------------------------------------------------------------------------------------------------------------------------------------------------------------------------------------------------------------------------------------------------------------------------------------------------------------------------------------------------------------------------------------------------------------------|
| Data monitoring | 21a | Monitoring of the study will be performed according to ICH GCP by the Clinical Research Monitor of the NKI or the person to whom the monitoring tasks have been delegated. Amongst others the following will be reviewed: compliance with the protocol, ICH GCP and all applicable regulatory requirements; consent procedures, including date of consent and signatures; study progress; (Serious) Adverse Events; completion of the (e)CRFs and verification of data against the source data; and storage, dispensing and accountability of study medication.<br>The Medical Ethical Committee of the NKI will review the study every year throughout the complete study duration. During this review, the committee will focus on monitoring of the safety of patients and evaluate the balance between the efficacy and the harmfulness of propranolol. |
|                 | 21b | An interim analysis is planned after the treatment of seven patients. If there are already three or more responses at this time point, the study will be stopped and stated positive. Otherwise an additional seven patients will be included. Results of the study will be shared and be submitted for publication in an international peer-reviewed journal.                                                                                                                                                                                                                                                                                                                                                                                                                                                                                              |
| Harms           | 22  | All adverse events will be recorded in the electronic case report forms (eCRF) during the weekly outpatient clinic visits. We will perform extra blood draws, ECGs and measurements of the vital signs during these visits for safety assessments. The recording of the adverse events will be done according to the National Cancer Institute Common Toxicity Criteria for Adverse Events (CTCAE) version 5.0.                                                                                                                                                                                                                                                                                                                                                                                                                                             |
| Auditing        | 23  | Frequency and procedures for auditing trial conduct will be done yearly by the MEC of the NKI and will be independent from investigators and the sponsor.                                                                                                                                                                                                                                                                                                                                                                                                                                                                                                                                                                                                                                                                                                   |

## Ethics and dissemination

- 42  
43  
44  
45  
46  
47  
48  
49  
50  
51  
52  
53  
54  
55  
56  
57  
58  
59  
60
- |                          |    |                                                                                                                                                                                                                                                                                                                                         |
|--------------------------|----|-----------------------------------------------------------------------------------------------------------------------------------------------------------------------------------------------------------------------------------------------------------------------------------------------------------------------------------------|
| Research ethics approval | 24 | Ethical approval was obtained from the Medical Ethical Committee of the Netherlands Cancer Institute.                                                                                                                                                                                                                                   |
| Protocol amendments      | 25 | Independent of the outcome, results of this study will be shared and submitted for publication in an international peer-reviewed journal. All essential documents (including patient files, the Investigator Study File, CRF's, amendments and electronic study data), data management and statistical files will be kept for 15 years. |

|    |                   |     |                                                                                                            |
|----|-------------------|-----|------------------------------------------------------------------------------------------------------------|
| 1  |                   |     |                                                                                                            |
| 2  | Consent or assent | 26a | Treating physicians will identify patients as possible candidates and                                      |
| 3  |                   |     | inform patients about the study. If patients agree to participate and                                      |
| 4  |                   |     | fulfil the selection criteria, patients will be included during an                                         |
| 5  |                   |     | outpatient clinic visit.                                                                                   |
| 6  |                   |     |                                                                                                            |
| 7  |                   | 26b | Not applicable                                                                                             |
| 8  |                   |     |                                                                                                            |
| 9  | Confidentiality   | 27  | The original results will also be recorded in the eCRF by the                                              |
| 10 |                   |     | investigators of the study. The data entry will be supervised by the                                       |
| 11 |                   |     | Clinical Research Monitor. The Medical Ethical Committee of the NKI                                        |
| 12 |                   |     | will review the study every year throughout the complete study                                             |
| 13 |                   |     | duration. During this review, the committee will focus on monitoring of                                    |
| 14 |                   |     | the safety of patients and evaluate the balance between the efficacy                                       |
| 15 |                   |     | and the harmfulness of propranolol.                                                                        |
| 16 |                   |     |                                                                                                            |
| 17 |                   |     |                                                                                                            |
| 18 | Declaration of    | 28  | No conflicts of interests to disclose related to this study                                                |
| 19 | interests         |     |                                                                                                            |
| 20 |                   |     |                                                                                                            |
| 21 |                   |     |                                                                                                            |
| 22 | Access to data    | 29  | Study investigators will have access to the final data. Results of the                                     |
| 23 |                   |     | study will be shared and be submitted for publication in an                                                |
| 24 |                   |     | international peer-reviewed journal.                                                                       |
| 25 |                   |     |                                                                                                            |
| 26 | Ancillary and     | 30  | The investigator has a liability insurance which is in accordance with                                     |
| 27 | post-trial care   |     | article 7 of the WMO.                                                                                      |
| 28 |                   |     | The AVL as sponsor of this study also has an insurance which is in                                         |
| 29 |                   |     | accordance with the legal requirements in the Netherlands (Article 7                                       |
| 30 |                   |     | WMO). This insurance provides cover for damage to research                                                 |
| 31 |                   |     | subjects through injury or death caused by the study. The insurance                                        |
| 32 |                   |     | applies to the damage that becomes apparent during the study or                                            |
| 33 |                   |     | within 4 years after the end of the study.                                                                 |
| 34 |                   |     |                                                                                                            |
| 35 |                   |     |                                                                                                            |
| 36 |                   |     |                                                                                                            |
| 37 | Dissemination     | 31a | Results of the study will be shared and be submitted for publication in                                    |
| 38 | policy            |     | an international peer-reviewed journal.                                                                    |
| 39 |                   |     |                                                                                                            |
| 40 |                   | 31b | Colleagues meeting the ICMJE criteria for authorship will become co-                                       |
| 41 |                   |     | author. No professional writers will be involved.                                                          |
| 42 |                   |     |                                                                                                            |
| 43 |                   | 31c | The study was registered through the Netherlands Trial Register (Trial                                     |
| 44 |                   |     | no. NL8118). <a href="https://www.trialregister.nl/trial/8118">https://www.trialregister.nl/trial/8118</a> |
| 45 |                   |     |                                                                                                            |
| 46 |                   |     |                                                                                                            |
| 47 | <b>Appendices</b> |     |                                                                                                            |
| 48 |                   |     |                                                                                                            |
| 49 | Informed consent  | 32  | Patient information folder in Dutch is attached                                                            |
| 50 | materials         |     |                                                                                                            |
| 51 |                   |     |                                                                                                            |
| 52 | Biological        | 33  | All data regarding the clinical records and biological specimens will be                                   |
| 53 | specimens         |     | stored anonymously for future research, if the patient gives consent in                                    |
| 54 |                   |     | the patient information folder.                                                                            |
| 55 |                   |     |                                                                                                            |

\*It is strongly recommended that this checklist be read in conjunction with the SPIRIT 2013 Explanation & Elaboration for important clarification on the items. Amendments to the protocol should be tracked and dated. The SPIRIT checklist is copyrighted by the SPIRIT

1  
2  
3  
4  
5  
6  
7  
8  
9  
10  
11  
12  
13  
14  
15  
16  
17  
18  
19  
20  
21  
22  
23  
24  
25  
26  
27  
28  
29  
30  
31  
32  
33  
34  
35  
36  
37  
38  
39  
40  
41  
42  
43  
44  
45  
46  
47  
48  
49  
50  
51  
52  
53  
54  
55  
56  
57  
58  
59  
60

Group under the Creative Commons "[Attribution-NonCommercial-NoDerivs 3.0 Unported](#)" license.

For peer review only
